# Supplementary material for: Sodium‐Glucose Cotransporter‐2 Inhibitor Prevents Stroke in Patients With Diabetes and Atrial Fibrillation
Source: PubMed Central journal article supplement — J Am Heart Assoc. 2023 May 15;12(10):e027764. doi: 10.1161/JAHA.122.027764 (PMC10227316; doi:10.1161/jaha.122.027764), 2023-05-15
Supplement: JAH3-12-e027764-s001.pdf [file JAH3-12-e027764-s001.pdf]

# **SUPPLEMENTAL MATERIAL**

**Table S1. Diagnoses ICD Codes.**

| 1. Hypertension | ICD-9  | ICD-9-CM Diagnosis Labeling                                                                                 | ICD-10 | ICD-10-PCS Diagnosis Labeling                                                                                                                                   |
|-----------------|--------|-------------------------------------------------------------------------------------------------------------|--------|-----------------------------------------------------------------------------------------------------------------------------------------------------------------|
|                 | 437.2  | Hypertensive encephalopathy                                                                                 | I67.4  | Hypertensive encephalopathy                                                                                                                                     |
|                 | 401.0  | Malignant essential hypertension                                                                            | I10    | Essential (primary) hypertension                                                                                                                                |
|                 | 401.1  | Benign essential hypertension                                                                               | I10    | Essential (primary) hypertension                                                                                                                                |
|                 | 401.9  | Essential hypertension, unspecified                                                                         | I10    | Essential (primary) hypertension                                                                                                                                |
|                 | 402.00 | Malignant hypertensive heart disease without congestive heart failure                                       | I11.9  | Hypertensive heart disease without heart failure                                                                                                                |
|                 | 402.01 | Malignant hypertensive heart disease with congestive heart failure                                          | I11.0  | Hypertensive heart disease with heart failure                                                                                                                   |
|                 | 402.10 | Benign hypertensive heart disease without congestive heart failure                                          | I11.9  | Hypertensive heart disease without heart failure                                                                                                                |
|                 | 402.11 | Benign hypertensive heart disease with congestive heart failure                                             | I11.0  | Hypertensive heart disease with heart failure                                                                                                                   |
|                 | 402.90 | Unspecified hypertensive heart disease without congestive heart failure                                     | I11.9  | Hypertensive heart disease without heart failure                                                                                                                |
|                 | 402.91 | Unspecified hypertensive heart disease with congestive heart failure                                        | I11.0  | Hypertensive heart disease with heart failure                                                                                                                   |
|                 | 403.00 | Malignant hypertensive renal disease without mention of renal failure                                       | I12.9  | Hypertensive chronic kidney disease with stage 1 through stage 4 chronic kidney disease, or unspecified chronic kidney disease                                  |
|                 | 403.01 | Malignant hypertensive renal disease with renal failure                                                     | I12.0  | Hypertensive chronic kidney disease with stage 5 chronic kidney disease or end stage renal disease                                                              |
|                 | 403.10 | Benign hypertensive renal disease without mention of renal failure                                          | I12.9  | Hypertensive chronic kidney disease with stage 1 through stage 4 chronic kidney disease, or unspecified chronic kidney disease                                  |
|                 | 403.11 | Benign hypertensive renal disease with renal failure                                                        | I12.0  | Hypertensive chronic kidney disease with stage 5 chronic kidney disease or end stage renal disease                                                              |
|                 | 403.90 | Unspecified hypertensive renal disease without mention of renal failure                                     | I12.9  | Hypertensive chronic kidney disease with stage 1 through stage 4 chronic kidney disease, or unspecified chronic kidney disease                                  |
|                 | 403.91 | Unspecified hypertensive renal disease with renal failure                                                   | I12.0  | Hypertensive chronic kidney disease with stage 5 chronic kidney disease or end stage renal disease                                                              |
|                 | 403.91 | Unspecified hypertensive renal disease with renal failure                                                   | I12.9  | Hypertensive chronic kidney disease with stage 1 through stage 4 chronic kidney disease, or unspecified chronic kidney disease                                  |
|                 | 404.00 | Malignant hypertensive heart and renal disease without mention of congestive heart failure or renal failure | I13.10 | Hypertensive heart and chronic kidney disease without heart failure, with stage 1 through stage 4 chronic kidney disease, or unspecified chronic kidney disease |

|  |        |                                                                                                               |        |                                                                                                                                                                 |
|--|--------|---------------------------------------------------------------------------------------------------------------|--------|-----------------------------------------------------------------------------------------------------------------------------------------------------------------|
|  | 404.01 | Malignant hypertensive heart and renal disease with congestive heart failure                                  | I13.0  | Hypertensive heart and chronic kidney disease with heart failure and stage 1 through stage 4 chronic kidney disease, or unspecified chronic kidney disease      |
|  | 404.02 | Malignant hypertensive heart and renal disease with renal failure                                             | I13.11 | Hypertensive heart and chronic kidney disease without heart failure, with stage 5 chronic kidney disease, or end stage renal disease                            |
|  | 404.03 | Malignant hypertensive heart and renal disease with congestive heart failure and renal failure                | I13.2  | Hypertensive heart and chronic kidney disease with heart failure and with stage 5 chronic kidney disease, or end stage renal disease                            |
|  | 404.10 | Benign hypertensive heart and renal disease without mention of congestive heart failure or renal failure      | I13.10 | Hypertensive heart and chronic kidney disease without heart failure, with stage 1 through stage 4 chronic kidney disease, or unspecified chronic kidney disease |
|  | 404.11 | Benign hypertensive heart and renal disease with congestive heart failure                                     | I13.0  | Hypertensive heart and chronic kidney disease with heart failure and stage 1 through stage 4 chronic kidney disease, or unspecified chronic kidney disease      |
|  | 404.12 | Benign hypertensive heart and renal disease with renal failure                                                | I13.11 | Hypertensive heart and chronic kidney disease without heart failure, with stage 5 chronic kidney disease, or end stage renal disease                            |
|  | 404.13 | Benign hypertensive heart and renal disease with congestive heart failure and renal failure                   | I13.2  | Hypertensive heart and chronic kidney disease with heart failure and with stage 5 chronic kidney disease, or end stage renal disease                            |
|  | 404.90 | Unspecified hypertensive heart and renal disease without mention of congestive heart failure or renal failure | I13.10 | Hypertensive heart and chronic kidney disease without heart failure, with stage 1 through stage 4 chronic kidney disease, or unspecified chronic kidney disease |
|  | 404.91 | Unspecified hypertensive heart and renal disease with congestive heart failure                                | I13.0  | Hypertensive heart and chronic kidney disease with heart failure and stage 1 through stage 4 chronic kidney disease, or unspecified chronic kidney disease      |
|  | 404.92 | Unspecified hypertensive heart and renal disease with renal failure                                           | I13.11 | Hypertensive heart and chronic kidney disease without heart failure, with stage 5 chronic kidney disease, or end stage renal disease                            |
|  | 404.93 | Unspecified hypertensive heart and renal disease with congestive heart failure and renal failure              | I13.2  | Hypertensive heart and chronic kidney disease with heart failure and with stage 5 chronic kidney disease, or end stage renal disease                            |
|  | 405.01 | Malignant renovascular secondary hypertension                                                                 | I15.0  | Renovascular hypertension                                                                                                                                       |
|  | 405.09 | Other malignant secondary hypertension                                                                        | I15.8  | Other secondary hypertension                                                                                                                                    |
|  | 405.11 | Benign renovascular secondary hypertension                                                                    | I15.0  | Renovascular hypertension                                                                                                                                       |
|  | 405.19 | Other benign secondary hypertension                                                                           | I15.8  | Other secondary hypertension                                                                                                                                    |

|             |              |                                                                                                                                                                        |               |                                                            |
|-------------|--------------|------------------------------------------------------------------------------------------------------------------------------------------------------------------------|---------------|------------------------------------------------------------|
|             | 405.91       | Unspecified renovascular secondary hypertension                                                                                                                        | I15.0         | Renovascular hypertension                                  |
|             | 405.91       | Unspecified renovascular secondary hypertension                                                                                                                        | I15.1         | Hypertension secondary to other renal disorders            |
|             | 405.99       | Other unspecified secondary hypertension                                                                                                                               | I15.2         | Hypertension secondary to endocrine disorders              |
|             | 405.99       | Other unspecified secondary hypertension                                                                                                                               | I15.8         | Other secondary hypertension                               |
|             | 405.99       | Other unspecified secondary hypertension                                                                                                                               | I15.9         | Secondary hypertension, unspecified                        |
|             | 416.0        | Primary pulmonary hypertension                                                                                                                                         | I27.0         | Primary pulmonary hypertension                             |
|             | 416.8        | Other chronic pulmonary heart diseases                                                                                                                                 | I27.2         | Other secondary pulmonary hypertension                     |
|             | 997.91       | Complications affecting other specified body system, not elsewhere classified, hypertension                                                                            | I97.3         | Postprocedural hypertension                                |
| 2. Diabetes | <b>ICD-9</b> | <b>ICD-9-CM Diagnosis Labeling</b>                                                                                                                                     | <b>ICD-10</b> | <b>ICD-10-PCS Diagnosis Labeling</b>                       |
|             | 250.00       | Diabetes mellitus without mention of complication, Type II [non-insulin dependent type][NIDDM type] [adult-onset type] or unspecified type, not stated as uncontrolled | E11.9         | Type 2 diabetes mellitus without complications             |
|             | 250.00       | Diabetes mellitus without mention of complication, Type II [non-insulin dependent type][NIDDM type] [adult-onset type] or unspecified type, not stated as uncontrolled | E13.9         | Other specified diabetes mellitus without complications    |
|             | 250.01       | Diabetes mellitus without mention of complication, Type I [insulin dependent type] [IDDM] [juvenile type], not stated as uncontrolled                                  | E10.9         | Type 1 diabetes mellitus without complications             |
|             | 250.02       | Diabetes mellitus without mention of complication, Type II [non-insulin dependent type] [NIDDM type] [adult-onset type] or unspecified type, uncontrolled              | E11.65        | Type 2 diabetes mellitus with hyperglycemia                |
|             | 250.03       | Diabetes mellitus without mention of complication, Type I [insulin dependent type] [IDDM] [juvenile type], uncontrolled                                                | E10.65        | Type 1 diabetes mellitus with hyperglycemia                |
|             | 250.10       | Diabetes with ketoacidosis, Type II [non-insulin dependent type] [NIDDM type][adult-onset type] or unspecified type, not stated as uncontrolled                        | E11.65        | Type 2 diabetes mellitus with hyperglycemia                |
|             | 250.11       | Diabetes with ketoacidosis, Type I [insulin dependent type][IDDM][juvenile type], not stated as uncontrolled                                                           | E10.10        | Type 1 diabetes mellitus with ketoacidosis without coma    |
|             | 250.12       | Diabetes with ketoacidosis, Type II [non-insulin dependent type][NIDDM type][adult-onset type] or unspecified type, uncontrolled                                       | E11.65        | Type 2 diabetes mellitus with hyperglycemia                |
|             | 250.12       | Diabetes with ketoacidosis, Type II [non-insulin dependent type][NIDDM type][adult-onset type] or unspecified type, uncontrolled                                       | E11.69        | Type 2 diabetes mellitus with other specified complication |
|             | 250.13       | Diabetes with ketoacidosis, Type I [insulin dependent type][IDDM][juvenile type], uncontrolled                                                                         | E10.10        | Type 1 diabetes mellitus with ketoacidosis without coma    |

|        |                                                                                                                                                      |        |                                                                                                                               |
|--------|------------------------------------------------------------------------------------------------------------------------------------------------------|--------|-------------------------------------------------------------------------------------------------------------------------------|
| 250.13 | Diabetes with ketoacidosis, Type I [insulin dependent type][IDDM][juvenile type], uncontrolled                                                       | E10.65 | Type 1 diabetes mellitus with hyperglycemia                                                                                   |
| 250.20 | Diabetes with hyperosmolar coma, Type II [non-insulin dependent type][NIDDM type][adult-onset type ] or unspecified type ,not stated as uncontrolled | E08.00 | Diabetes mellitus due to underlying condition with hyperosmolarity without nonketotic hyperglycemic-hyperosmolar coma (NKHHC) |
| 250.20 | Diabetes with hyperosmolar coma, Type II [non-insulin dependent type][NIDDM type][adult-onset type ] or unspecified type ,not stated as uncontrolled | E08.01 | Diabetes mellitus due to underlying condition with hyperosmolarity with coma                                                  |
| 250.20 | Diabetes with hyperosmolar coma, Type II [non-insulin dependent type][NIDDM type][adult-onset type ] or unspecified type ,not stated as uncontrolled | E09.00 | Drug or chemical induced diabetes mellitus with hyperosmolarity without nonketotic hyperglycemic-hyperosmolar coma (NKHHC)    |
| 250.20 | Diabetes with hyperosmolar coma, Type II [non-insulin dependent type][NIDDM type][adult-onset type ] or unspecified type ,not stated as uncontrolled | E09.01 | Drug or chemical induced diabetes mellitus with hyperosmolarity with coma                                                     |
| 250.20 | Diabetes with hyperosmolar coma, Type II [non-insulin dependent type][NIDDM type][adult-onset type ] or unspecified type ,not stated as uncontrolled | E11.00 | Type 2 diabetes mellitus with hyperosmolarity without nonketotic hyperglycemic-hyperosmolar coma (NKHHC)                      |
| 250.20 | Diabetes with hyperosmolar coma, Type II [non-insulin dependent type][NIDDM type][adult-onset type ] or unspecified type ,not stated as uncontrolled | E11.01 | Type 2 diabetes mellitus with hyperosmolarity with coma                                                                       |
| 250.20 | Diabetes with hyperosmolar coma, Type II [non-insulin dependent type][NIDDM type][adult-onset type ] or unspecified type ,not stated as uncontrolled | E13.00 | Other specified diabetes mellitus with hyperosmolarity without nonketotic hyperglycemic-hyperosmolar coma (NKHHC)             |
| 250.20 | Diabetes with hyperosmolar coma, Type II [non-insulin dependent type][NIDDM type][adult-onset type ] or unspecified type ,not stated as uncontrolled | E13.01 | Other specified diabetes mellitus with hyperosmolarity with coma                                                              |
| 250.21 | Diabetes with hyperosmolar coma, Type I [insulin dependent type][IDDM][juvenile type], not stated as uncontrolled                                    | E10.69 | Type 1 diabetes mellitus with other specified complication                                                                    |
| 250.22 | Diabetes with hyperosmolar coma, Type II [non-insulin dependent type][NIDDM type][ adult-onset type ] or unspecified type, uncontrolled              | E11.00 | Type 2 diabetes mellitus with hyperosmolarity without nonketotic hyperglycemic-hyperosmolar coma (NKHHC)                      |
| 250.22 | Diabetes with hyperosmolar coma, Type II [non-insulin dependent type][NIDDM type][ adult-onset type ] or unspecified type, uncontrolled              | E11.01 | Type 2 diabetes mellitus with hyperosmolarity with coma                                                                       |
| 250.22 | Diabetes with hyperosmolar coma, Type II [non-insulin dependent type][NIDDM type][ adult-onset type ] or unspecified type, uncontrolled              | E11.65 | Type 2 diabetes mellitus with hyperglycemia                                                                                   |
| 250.23 | Diabetes with hyperosmolar coma, Type I [insulin dependent type][IDDM][juvenile type], uncontrolled                                                  | E10.65 | Type 1 diabetes mellitus with hyperglycemia                                                                                   |
| 250.23 | Diabetes with hyperosmolar coma, Type I [insulin dependent type][IDDM][juvenile type], uncontrolled                                                  | E10.69 | Type 1 diabetes mellitus with other specified complication                                                                    |

|        |                                                                                                                                                        |         |                                                                           |
|--------|--------------------------------------------------------------------------------------------------------------------------------------------------------|---------|---------------------------------------------------------------------------|
| 250.30 | Diabetes with other coma, Type II [non-insulin dependent type][NIDDM type][adult-onset type] or unspecified type ,not stated as uncontrolled           | E08.641 | Diabetes mellitus due to underlying condition with hypoglycemia with coma |
| 250.30 | Diabetes with other coma, Type II [non-insulin dependent type][NIDDM type][adult-onset type] or unspecified type ,not stated as uncontrolled           | E09.641 | Drug or chemical induced diabetes mellitus with hypoglycemia with coma    |
| 250.30 | Diabetes with other coma, Type II [non-insulin dependent type][NIDDM type][adult-onset type] or unspecified type ,not stated as uncontrolled           | E11.641 | Type 2 diabetes mellitus with hypoglycemia with coma                      |
| 250.30 | Diabetes with other coma, Type II [non-insulin dependent type][NIDDM type][adult-onset type] or unspecified type ,not stated as uncontrolled           | E13.11  | Other specified diabetes mellitus with ketoacidosis with coma             |
| 250.30 | Diabetes with other coma, Type II [non-insulin dependent type][NIDDM type][adult-onset type] or unspecified type ,not stated as uncontrolled           | E13.641 | Other specified diabetes mellitus with hypoglycemia with coma             |
| 250.31 | Diabetes with other coma, Type I [insulin dependent type][IDDM][juvenile type], not stated as uncontrolled                                             | E10.11  | Type 1 diabetes mellitus with ketoacidosis with coma                      |
| 250.31 | Diabetes with other coma, Type I [insulin dependent type][IDDM][juvenile type], not stated as uncontrolled                                             | E10.641 | Type 1 diabetes mellitus with hypoglycemia with coma                      |
| 250.32 | Diabetes with other coma, Type II [non-insulin dependent type][NIDDM type][adult-onset type] or unspecified type, uncontrolled                         | E11.641 | Type 2 diabetes mellitus with hypoglycemia with coma                      |
| 250.32 | Diabetes with other coma, Type II [non-insulin dependent type][NIDDM type][adult-onset type] or unspecified type, uncontrolled                         | E11.65  | Type 2 diabetes mellitus with hyperglycemia                               |
| 250.33 | Diabetes with other coma, Type I [insulin dependent type][IDDM][juvenile type], uncontrolled                                                           | E10.11  | Type 1 diabetes mellitus with ketoacidosis with coma                      |
| 250.33 | Diabetes with other coma, Type I [insulin dependent type][IDDM][juvenile type], uncontrolled                                                           | E10.65  | Type 1 diabetes mellitus with hyperglycemia                               |
| 250.40 | Diabetes with renal manifestations, Type II [non-insulin dependent type][NIDDM type][adult-onset type] or unspecified type ,not stated as uncontrolled | E11.21  | Type 2 diabetes mellitus with diabetic nephropathy                        |
| 250.40 | Diabetes with renal manifestations, Type II [non-insulin dependent type][NIDDM type][adult-onset type] or unspecified type ,not stated as uncontrolled | E11.22  | Type 2 diabetes mellitus with diabetic chronic kidney disease             |
| 250.40 | Diabetes with renal manifestations, Type II [non-insulin dependent type][NIDDM type][adult-onset type] or unspecified type ,not stated as uncontrolled | E11.29  | Type 2 diabetes mellitus with other diabetic kidney complication          |

|        |                                                                                                                                                              |         |                                                                                                           |
|--------|--------------------------------------------------------------------------------------------------------------------------------------------------------------|---------|-----------------------------------------------------------------------------------------------------------|
| 250.40 | Diabetes with renal manifestations, Type II [non-insulin dependent type][NIDDM type][adult-onset type] or unspecified type ,not stated as uncontrolled       | E13.21  | Other specified diabetes mellitus with diabetic nephropathy                                               |
| 250.40 | Diabetes with renal manifestations, Type II [non-insulin dependent type][NIDDM type][adult-onset type] or unspecified type ,not stated as uncontrolled       | E13.22  | Other specified diabetes mellitus with diabetic chronic kidney disease                                    |
| 250.40 | Diabetes with renal manifestations, Type II [non-insulin dependent type][NIDDM type][adult-onset type] or unspecified type ,not stated as uncontrolled       | E13.29  | Other specified diabetes mellitus with other diabetic kidney complication                                 |
| 250.41 | Diabetes with renal manifestations, Type I [insulin dependent type][IDDM][juvenile type], not stated as uncontrolled                                         | E10.21  | Type 1 diabetes mellitus with diabetic nephropathy                                                        |
| 250.41 | Diabetes with renal manifestations, Type I [insulin dependent type][IDDM][juvenile type], not stated as uncontrolled                                         | E10.22  | Type 1 diabetes mellitus with diabetic chronic kidney disease                                             |
| 250.41 | Diabetes with renal manifestations, Type I [insulin dependent type][IDDM][juvenile type], not stated as uncontrolled                                         | E10.29  | Type 1 diabetes mellitus with other diabetic kidney complication                                          |
| 250.42 | Diabetes with renal manifestations, Type II [non-insulin dependent type][NIDDM type][adult-onset type] or unspecified type, uncontrolled                     | E11.21  | Type 2 diabetes mellitus with diabetic nephropathy                                                        |
| 250.42 | Diabetes with renal manifestations, Type II [non-insulin dependent type][NIDDM type][adult-onset type] or unspecified type, uncontrolled                     | E11.22  | Type 2 diabetes mellitus with diabetic chronic kidney disease                                             |
| 250.42 | Diabetes with renal manifestations, Type II [non-insulin dependent type][NIDDM type][adult-onset type] or unspecified type, uncontrolled                     | E11.29  | Type 2 diabetes mellitus with other diabetic kidney complication                                          |
| 250.42 | Diabetes with renal manifestations, Type II [non-insulin dependent type][NIDDM type][adult-onset type] or unspecified type, uncontrolled                     | E11.65  | Type 2 diabetes mellitus with hyperglycemia                                                               |
| 250.43 | Diabetes with renal manifestations, Type I [insulin dependent type][IDDM][juvenile type], uncontrolled                                                       | E10.21  | Type 1 diabetes mellitus with diabetic nephropathy                                                        |
| 250.43 | Diabetes with renal manifestations, Type I [insulin dependent type][IDDM][juvenile type], uncontrolled                                                       | E10.65  | Type 1 diabetes mellitus with hyperglycemia                                                               |
| 250.50 | Diabetes with ophthalmic manifestations, Type II [non-insulin dependent type][NIDDM type][adult-onset type ] or unspecified type ,not stated as uncontrolled | E08.311 | Diabetes mellitus due to underlying condition with unspecified diabetic retinopathy with macular edema    |
| 250.50 | Diabetes with ophthalmic manifestations, Type II [non-insulin dependent type][NIDDM type][adult-onset type ] or unspecified type ,not stated as uncontrolled | E08.319 | Diabetes mellitus due to underlying condition with unspecified diabetic retinopathy without macular edema |

|        |                                                                                                                                                              |         |                                                                                                                         |
|--------|--------------------------------------------------------------------------------------------------------------------------------------------------------------|---------|-------------------------------------------------------------------------------------------------------------------------|
| 250.50 | Diabetes with ophthalmic manifestations, Type II [non-insulin dependent type][NIDDM type][adult-onset type ] or unspecified type ,not stated as uncontrolled | E08.321 | Diabetes mellitus due to underlying condition with mild nonproliferative diabetic retinopathy with macular edema        |
| 250.50 | Diabetes with ophthalmic manifestations, Type II [non-insulin dependent type][NIDDM type][adult-onset type ] or unspecified type ,not stated as uncontrolled | E08.329 | Diabetes mellitus due to underlying condition with mild nonproliferative diabetic retinopathy without macular edema     |
| 250.50 | Diabetes with ophthalmic manifestations, Type II [non-insulin dependent type][NIDDM type][adult-onset type ] or unspecified type ,not stated as uncontrolled | E08.331 | Diabetes mellitus due to underlying condition with moderate nonproliferative diabetic retinopathy with macular edema    |
| 250.50 | Diabetes with ophthalmic manifestations, Type II [non-insulin dependent type][NIDDM type][adult-onset type ] or unspecified type ,not stated as uncontrolled | E08.339 | Diabetes mellitus due to underlying condition with moderate nonproliferative diabetic retinopathy without macular edema |
| 250.50 | Diabetes with ophthalmic manifestations, Type II [non-insulin dependent type][NIDDM type][adult-onset type ] or unspecified type ,not stated as uncontrolled | E08.341 | Diabetes mellitus due to underlying condition with severe nonproliferative diabetic retinopathy with macular edema      |
| 250.50 | Diabetes with ophthalmic manifestations, Type II [non-insulin dependent type][NIDDM type][adult-onset type ] or unspecified type ,not stated as uncontrolled | E08.349 | Diabetes mellitus due to underlying condition with severe nonproliferative diabetic retinopathy without macular edema   |
| 250.50 | Diabetes with ophthalmic manifestations, Type II [non-insulin dependent type][NIDDM type][adult-onset type ] or unspecified type ,not stated as uncontrolled | E08.351 | Diabetes mellitus due to underlying condition with proliferative diabetic retinopathy with macular edema                |
| 250.50 | Diabetes with ophthalmic manifestations, Type II [non-insulin dependent type][NIDDM type][adult-onset type ] or unspecified type ,not stated as uncontrolled | E08.359 | Diabetes mellitus due to underlying condition with proliferative diabetic retinopathy without macular edema             |
| 250.50 | Diabetes with ophthalmic manifestations, Type II [non-insulin dependent type][NIDDM type][adult-onset type ] or unspecified type ,not stated as uncontrolled | E08.36  | Diabetes mellitus due to underlying condition with diabetic cataract                                                    |
| 250.50 | Diabetes with ophthalmic manifestations, Type II [non-insulin dependent type][NIDDM type][adult-onset type ] or unspecified type ,not stated as uncontrolled | E09.311 | Drug or chemical induced diabetes mellitus with unspecified diabetic retinopathy with macular edema                     |



|        |                                                                                                                                                              |         |                                                                                                                      |
|--------|--------------------------------------------------------------------------------------------------------------------------------------------------------------|---------|----------------------------------------------------------------------------------------------------------------------|
| 250.50 | Diabetes with ophthalmic manifestations, Type II [non-insulin dependent type][NIDDM type][adult-onset type ] or unspecified type ,not stated as uncontrolled | E09.319 | Drug or chemical induced diabetes mellitus with unspecified diabetic retinopathy without macular edema               |
| 250.50 | Diabetes with ophthalmic manifestations, Type II [non-insulin dependent type][NIDDM type][adult-onset type ] or unspecified type ,not stated as uncontrolled | E09.321 | Drug or chemical induced diabetes mellitus with mild nonproliferative diabetic retinopathy with macular edema        |
| 250.50 | Diabetes with ophthalmic manifestations, Type II [non-insulin dependent type][NIDDM type][adult-onset type ] or unspecified type ,not stated as uncontrolled | E09.329 | Drug or chemical induced diabetes mellitus with mild nonproliferative diabetic retinopathy without macular edema     |
| 250.50 | Diabetes with ophthalmic manifestations, Type II [non-insulin dependent type][NIDDM type][adult-onset type ] or unspecified type ,not stated as uncontrolled | E09.331 | Drug or chemical induced diabetes mellitus with moderate nonproliferative diabetic retinopathy with macular edema    |
| 250.50 | Diabetes with ophthalmic manifestations, Type II [non-insulin dependent type][NIDDM type][adult-onset type ] or unspecified type ,not stated as uncontrolled | E09.339 | Drug or chemical induced diabetes mellitus with moderate nonproliferative diabetic retinopathy without macular edema |
| 250.50 | Diabetes with ophthalmic manifestations, Type II [non-insulin dependent type][NIDDM type][adult-onset type ] or unspecified type ,not stated as uncontrolled | E09.341 | Drug or chemical induced diabetes mellitus with severe nonproliferative diabetic retinopathy with macular edema      |
| 250.50 | Diabetes with ophthalmic manifestations, Type II [non-insulin dependent type][NIDDM type][adult-onset type ] or unspecified type ,not stated as uncontrolled | E09.349 | Drug or chemical induced diabetes mellitus with severe nonproliferative diabetic retinopathy without macular edema   |
| 250.50 | Diabetes with ophthalmic manifestations, Type II [non-insulin dependent type][NIDDM type][adult-onset type ] or unspecified type ,not stated as uncontrolled | E09.351 | Drug or chemical induced diabetes mellitus with proliferative diabetic retinopathy with macular edema                |
| 250.50 | Diabetes with ophthalmic manifestations, Type II [non-insulin dependent type][NIDDM type][adult-onset type ] or unspecified type ,not stated as uncontrolled | E09.359 | Drug or chemical induced diabetes mellitus with proliferative diabetic retinopathy without macular edema             |
| 250.50 | Diabetes with ophthalmic manifestations, Type II [non-insulin dependent type][NIDDM type][adult-onset type ] or unspecified type ,not stated as uncontrolled | E09.36  | Drug or chemical induced diabetes mellitus with diabetic cataract                                                    |
| 250.50 | Diabetes with ophthalmic manifestations, Type II [non-insulin dependent type][NIDDM type][adult-                                                             | E11.311 | Type 2 diabetes mellitus with unspecified diabetic retinopathy with macular edema                                    |

|  |        |                                                                                                                                                              |         |                                                                                                    |
|--|--------|--------------------------------------------------------------------------------------------------------------------------------------------------------------|---------|----------------------------------------------------------------------------------------------------|
|  |        | onset type ] or unspecified type ,not stated as uncontrolled                                                                                                 |         |                                                                                                    |
|  | 250.50 | Diabetes with ophthalmic manifestations, Type II [non-insulin dependent type][NIDDM type][adult-onset type ] or unspecified type ,not stated as uncontrolled | E11.319 | Type 2 diabetes mellitus with unspecified diabetic retinopathy without macular edema               |
|  | 250.50 | Diabetes with ophthalmic manifestations, Type II [non-insulin dependent type][NIDDM type][adult-onset type ] or unspecified type ,not stated as uncontrolled | E11.321 | Type 2 diabetes mellitus with mild nonproliferative diabetic retinopathy with macular edema        |
|  | 250.50 | Diabetes with ophthalmic manifestations, Type II [non-insulin dependent type][NIDDM type][adult-onset type ] or unspecified type ,not stated as uncontrolled | E11.329 | Type 2 diabetes mellitus with mild nonproliferative diabetic retinopathy without macular edema     |
|  | 250.50 | Diabetes with ophthalmic manifestations, Type II [non-insulin dependent type][NIDDM type][adult-onset type ] or unspecified type ,not stated as uncontrolled | E11.331 | Type 2 diabetes mellitus with moderate nonproliferative diabetic retinopathy with macular edema    |
|  | 250.50 | Diabetes with ophthalmic manifestations, Type II [non-insulin dependent type][NIDDM type][adult-onset type ] or unspecified type ,not stated as uncontrolled | E11.339 | Type 2 diabetes mellitus with moderate nonproliferative diabetic retinopathy without macular edema |
|  | 250.50 | Diabetes with ophthalmic manifestations, Type II [non-insulin dependent type][NIDDM type][adult-onset type ] or unspecified type ,not stated as uncontrolled | E11.341 | Type 2 diabetes mellitus with severe nonproliferative diabetic retinopathy with macular edema      |
|  | 250.50 | Diabetes with ophthalmic manifestations, Type II [non-insulin dependent type][NIDDM type][adult-onset type ] or unspecified type ,not stated as uncontrolled | E11.349 | Type 2 diabetes mellitus with severe nonproliferative diabetic retinopathy without macular edema   |
|  | 250.50 | Diabetes with ophthalmic manifestations, Type II [non-insulin dependent type][NIDDM type][adult-onset type ] or unspecified type ,not stated as uncontrolled | E11.351 | Type 2 diabetes mellitus with proliferative diabetic retinopathy with macular edema                |
|  | 250.50 | Diabetes with ophthalmic manifestations, Type II [non-insulin dependent type][NIDDM type][adult-onset type ] or unspecified type ,not stated as uncontrolled | E11.359 | Type 2 diabetes mellitus with proliferative diabetic retinopathy without macular edema             |
|  | 250.50 | Diabetes with ophthalmic manifestations, Type II [non-insulin dependent type][NIDDM type][adult-onset type ] or unspecified type ,not stated as uncontrolled | E11.36  | Type 2 diabetes mellitus with diabetic cataract                                                    |

|        |                                                                                                                                                              |         |                                                                                                             |
|--------|--------------------------------------------------------------------------------------------------------------------------------------------------------------|---------|-------------------------------------------------------------------------------------------------------------|
| 250.50 | Diabetes with ophthalmic manifestations, Type II [non-insulin dependent type][NIDDM type][adult-onset type ] or unspecified type ,not stated as uncontrolled | E11.39  | Type 2 diabetes mellitus with other diabetic ophthalmic complication                                        |
| 250.50 | Diabetes with ophthalmic manifestations, Type II [non-insulin dependent type][NIDDM type][adult-onset type ] or unspecified type ,not stated as uncontrolled | E13.311 | Other specified diabetes mellitus with unspecified diabetic retinopathy with macular edema                  |
| 250.50 | Diabetes with ophthalmic manifestations, Type II [non-insulin dependent type][NIDDM type][adult-onset type ] or unspecified type ,not stated as uncontrolled | E13.319 | Other specified diabetes mellitus with unspecified diabetic retinopathy without macular edema               |
| 250.50 | Diabetes with ophthalmic manifestations, Type II [non-insulin dependent type][NIDDM type][adult-onset type ] or unspecified type ,not stated as uncontrolled | E13.321 | Other specified diabetes mellitus with mild nonproliferative diabetic retinopathy with macular edema        |
| 250.50 | Diabetes with ophthalmic manifestations, Type II [non-insulin dependent type][NIDDM type][adult-onset type ] or unspecified type ,not stated as uncontrolled | E13.329 | Other specified diabetes mellitus with mild nonproliferative diabetic retinopathy without macular edema     |
| 250.50 | Diabetes with ophthalmic manifestations, Type II [non-insulin dependent type][NIDDM type][adult-onset type ] or unspecified type ,not stated as uncontrolled | E13.331 | Other specified diabetes mellitus with moderate nonproliferative diabetic retinopathy with macular edema    |
| 250.50 | Diabetes with ophthalmic manifestations, Type II [non-insulin dependent type][NIDDM type][adult-onset type ] or unspecified type ,not stated as uncontrolled | E13.339 | Other specified diabetes mellitus with moderate nonproliferative diabetic retinopathy without macular edema |
| 250.50 | Diabetes with ophthalmic manifestations, Type II [non-insulin dependent type][NIDDM type][adult-onset type ] or unspecified type ,not stated as uncontrolled | E13.341 | Other specified diabetes mellitus with severe nonproliferative diabetic retinopathy with macular edema      |
| 250.52 | Diabetes with ophthalmic manifestations, Type II [non-insulin dependent type][NIDDM type][adult-onset type ] or unspecified type, uncontrolled               | E11.319 | Type 2 diabetes mellitus with unspecified diabetic retinopathy without macular edema                        |
| 250.52 | Diabetes with ophthalmic manifestations, Type II [non-insulin dependent type][NIDDM type][adult-onset type ] or unspecified type, uncontrolled               | E11.321 | Type 2 diabetes mellitus with mild nonproliferative diabetic retinopathy with macular edema                 |
| 250.52 | Diabetes with ophthalmic manifestations, Type II [non-insulin dependent type][NIDDM type][adult-onset type ] or unspecified type, uncontrolled               | E11.329 | Type 2 diabetes mellitus with mild nonproliferative diabetic retinopathy without macular edema              |

|        |                                                                                                                                                |         |                                                                                                          |
|--------|------------------------------------------------------------------------------------------------------------------------------------------------|---------|----------------------------------------------------------------------------------------------------------|
| 250.52 | Diabetes with ophthalmic manifestations, Type II [non-insulin dependent type][NIDDM type][adult-onset type ] or unspecified type, uncontrolled | E11.331 | Type 2 diabetes mellitus with moderate nonproliferative diabetic retinopathy with macular edema          |
| 250.52 | Diabetes with ophthalmic manifestations, Type II [non-insulin dependent type][NIDDM type][adult-onset type ] or unspecified type, uncontrolled | E11.339 | Type 2 diabetes mellitus with moderate nonproliferative diabetic retinopathy without macular edema       |
| 250.52 | Diabetes with ophthalmic manifestations, Type II [non-insulin dependent type][NIDDM type][adult-onset type ] or unspecified type, uncontrolled | E11.341 | Type 2 diabetes mellitus with severe nonproliferative diabetic retinopathy with macular edema            |
| 250.52 | Diabetes with ophthalmic manifestations, Type II [non-insulin dependent type][NIDDM type][adult-onset type ] or unspecified type, uncontrolled | E11.349 | Type 2 diabetes mellitus with severe nonproliferative diabetic retinopathy without macular edema         |
| 250.52 | Diabetes with ophthalmic manifestations, Type II [non-insulin dependent type][NIDDM type][adult-onset type ] or unspecified type, uncontrolled | E11.351 | Type 2 diabetes mellitus with proliferative diabetic retinopathy with macular edema                      |
| 250.52 | Diabetes with ophthalmic manifestations, Type II [non-insulin dependent type][NIDDM type][adult-onset type ] or unspecified type, uncontrolled | E11.359 | Type 2 diabetes mellitus with proliferative diabetic retinopathy without macular edema                   |
| 250.52 | Diabetes with ophthalmic manifestations, Type II [non-insulin dependent type][NIDDM type][adult-onset type ] or unspecified type, uncontrolled | E11.36  | Type 2 diabetes mellitus with diabetic cataract                                                          |
| 250.52 | Diabetes with ophthalmic manifestations, Type II [non-insulin dependent type][NIDDM type][adult-onset type ] or unspecified type, uncontrolled | E11.39  | Type 2 diabetes mellitus with other diabetic ophthalmic complication                                     |
| 250.52 | Diabetes with ophthalmic manifestations, Type II [non-insulin dependent type][NIDDM type][adult-onset type ] or unspecified type, uncontrolled | E11.65  | Type 2 diabetes mellitus with hyperglycemia                                                              |
| 250.52 | Diabetes with ophthalmic manifestations, Type II [non-insulin dependent type][NIDDM type][adult-onset type ] or unspecified type, uncontrolled | E13.311 | Other specified diabetes mellitus with unspecified diabetic retinopathy with macular edema               |
| 250.52 | Diabetes with ophthalmic manifestations, Type II [non-insulin dependent type][NIDDM type][adult-onset type ] or unspecified type, uncontrolled | E13.319 | Other specified diabetes mellitus with unspecified diabetic retinopathy without macular edema            |
| 250.52 | Diabetes with ophthalmic manifestations, Type II [non-insulin dependent type][NIDDM type][adult-onset type ] or unspecified type, uncontrolled | E13.321 | Other specified diabetes mellitus with mild nonproliferative diabetic retinopathy with macular edema     |
| 250.52 | Diabetes with ophthalmic manifestations, Type II [non-insulin dependent type][NIDDM type][adult-onset type ] or unspecified type, uncontrolled | E13.329 | Other specified diabetes mellitus with mild nonproliferative diabetic retinopathy without macular edema  |
| 250.52 | Diabetes with ophthalmic manifestations, Type II [non-insulin dependent type][NIDDM type][adult-onset type ] or unspecified type, uncontrolled | E13.331 | Other specified diabetes mellitus with moderate nonproliferative diabetic retinopathy with macular edema |

|        |                                                                                                                                                               |         |                                                                                                             |
|--------|---------------------------------------------------------------------------------------------------------------------------------------------------------------|---------|-------------------------------------------------------------------------------------------------------------|
| 250.52 | Diabetes with ophthalmic manifestations, Type II [non-insulin dependent type][NIDDM type][adult-onset type ] or unspecified type, uncontrolled                | E13.339 | Other specified diabetes mellitus with moderate nonproliferative diabetic retinopathy without macular edema |
| 250.52 | Diabetes with ophthalmic manifestations, Type II [non-insulin dependent type][NIDDM type][adult-onset type ] or unspecified type, uncontrolled                | E13.341 | Other specified diabetes mellitus with severe nonproliferative diabetic retinopathy with macular edema      |
| 250.52 | Diabetes with ophthalmic manifestations, Type II [non-insulin dependent type][NIDDM type][adult-onset type ] or unspecified type, uncontrolled                | E13.349 | Other specified diabetes mellitus with severe nonproliferative diabetic retinopathy without macular edema   |
| 250.52 | Diabetes with ophthalmic manifestations, Type II [non-insulin dependent type][NIDDM type][adult-onset type ] or unspecified type, uncontrolled                | E13.351 | Other specified diabetes mellitus with proliferative diabetic retinopathy with macular edema                |
| 250.52 | Diabetes with ophthalmic manifestations, Type II [non-insulin dependent type][NIDDM type][adult-onset type ] or unspecified type, uncontrolled                | E13.359 | Other specified diabetes mellitus with proliferative diabetic retinopathy without macular edema             |
| 250.52 | Diabetes with ophthalmic manifestations, Type II [non-insulin dependent type][NIDDM type][adult-onset type ] or unspecified type, uncontrolled                | E13.36  | Other specified diabetes mellitus with diabetic cataract                                                    |
| 250.52 | Diabetes with ophthalmic manifestations, Type II [non-insulin dependent type][NIDDM type][adult-onset type ] or unspecified type, uncontrolled                | E13.39  | Other specified diabetes mellitus with other diabetic ophthalmic complication                               |
| 250.53 | Diabetes with ophthalmic manifestations, Type I [insulin dependent type][IDDM][juvenile type], uncontrolled                                                   | E10.311 | Type 1 diabetes mellitus with unspecified diabetic retinopathy with macular edema                           |
| 250.53 | Diabetes with ophthalmic manifestations, Type I [insulin dependent type][IDDM][juvenile type], uncontrolled                                                   | E10.319 | Type 1 diabetes mellitus with unspecified diabetic retinopathy without macular edema                        |
| 250.53 | Diabetes with ophthalmic manifestations, Type I [insulin dependent type][IDDM][juvenile type], uncontrolled                                                   | E10.36  | Type 1 diabetes mellitus with diabetic cataract                                                             |
| 250.53 | Diabetes with ophthalmic manifestations, Type I [insulin dependent type][IDDM][juvenile type], uncontrolled                                                   | E10.39  | Type 1 diabetes mellitus with other diabetic ophthalmic complication                                        |
| 250.53 | Diabetes with ophthalmic manifestations, Type I [insulin dependent type][IDDM][juvenile type], uncontrolled                                                   | E10.65  | Type 1 diabetes mellitus with hyperglycemia                                                                 |
| 250.60 | Diabetes with neurological manifestations, Type II [non-insulin dependent type][NIDDM type][adult-onset type] or unspecified type ,not stated as uncontrolled | E08.40  | Diabetes mellitus due to underlying condition with diabetic neuropathy, unspecified                         |
| 250.60 | Diabetes with neurological manifestations, Type II [non-insulin dependent type][NIDDM type][adult-                                                            | E08.41  | Diabetes mellitus due to underlying condition with diabetic mononeuropathy                                  |

|  |        |                                                                                                                                                               |        |                                                                                                                          |
|--|--------|---------------------------------------------------------------------------------------------------------------------------------------------------------------|--------|--------------------------------------------------------------------------------------------------------------------------|
|  |        | onset type] or unspecified type ,not stated as uncontrolled                                                                                                   |        |                                                                                                                          |
|  | 250.60 | Diabetes with neurological manifestations, Type II [non-insulin dependent type][NIDDM type][adult-onset type] or unspecified type ,not stated as uncontrolled | E08.42 | Diabetes mellitus due to underlying condition with diabetic polyneuropathy                                               |
|  | 250.60 | Diabetes with neurological manifestations, Type II [non-insulin dependent type][NIDDM type][adult-onset type] or unspecified type ,not stated as uncontrolled | E08.43 | Diabetes mellitus due to underlying condition with diabetic autonomic (poly)neuropathy                                   |
|  | 250.60 | Diabetes with neurological manifestations, Type II [non-insulin dependent type][NIDDM type][adult-onset type] or unspecified type ,not stated as uncontrolled | E08.44 | Diabetes mellitus due to underlying condition with diabetic amyotrophy                                                   |
|  | 250.60 | Diabetes with neurological manifestations, Type II [non-insulin dependent type][NIDDM type][adult-onset type] or unspecified type ,not stated as uncontrolled | E08.49 | Diabetes mellitus due to underlying condition with other diabetic neurological complication                              |
|  | 250.60 | Diabetes with neurological manifestations, Type II [non-insulin dependent type][NIDDM type][adult-onset type] or unspecified type ,not stated as uncontrolled | E09.40 | Drug or chemical induced diabetes mellitus with neurological complications with diabetic neuropathy, unspecified         |
|  | 250.60 | Diabetes with neurological manifestations, Type II [non-insulin dependent type][NIDDM type][adult-onset type] or unspecified type ,not stated as uncontrolled | E09.41 | Drug or chemical induced diabetes mellitus with neurological complications with diabetic mononeuropathy                  |
|  | 250.60 | Diabetes with neurological manifestations, Type II [non-insulin dependent type][NIDDM type][adult-onset type] or unspecified type ,not stated as uncontrolled | E09.42 | Drug or chemical induced diabetes mellitus with neurological complications with diabetic polyneuropathy                  |
|  | 250.60 | Diabetes with neurological manifestations, Type II [non-insulin dependent type][NIDDM type][adult-onset type] or unspecified type ,not stated as uncontrolled | E09.43 | Drug or chemical induced diabetes mellitus with neurological complications with diabetic autonomic (poly)neuropathy      |
|  | 250.60 | Diabetes with neurological manifestations, Type II [non-insulin dependent type][NIDDM type][adult-onset type] or unspecified type ,not stated as uncontrolled | E09.44 | Drug or chemical induced diabetes mellitus with neurological complications with diabetic amyotrophy                      |
|  | 250.60 | Diabetes with neurological manifestations, Type II [non-insulin dependent type][NIDDM type][adult-onset type] or unspecified type ,not stated as uncontrolled | E09.49 | Drug or chemical induced diabetes mellitus with neurological complications with other diabetic neurological complication |

|        |                                                                                                                                                               |        |                                                                            |
|--------|---------------------------------------------------------------------------------------------------------------------------------------------------------------|--------|----------------------------------------------------------------------------|
| 250.60 | Diabetes with neurological manifestations, Type II [non-insulin dependent type][NIDDM type][adult-onset type] or unspecified type ,not stated as uncontrolled | E11.40 | Type 2 diabetes mellitus with diabetic neuropathy, unspecified             |
| 250.60 | Diabetes with neurological manifestations, Type II [non-insulin dependent type][NIDDM type][adult-onset type] or unspecified type ,not stated as uncontrolled | E11.41 | Type 2 diabetes mellitus with diabetic mononeuropathy                      |
| 250.60 | Diabetes with neurological manifestations, Type II [non-insulin dependent type][NIDDM type][adult-onset type] or unspecified type ,not stated as uncontrolled | E11.42 | Type 2 diabetes mellitus with diabetic polyneuropathy                      |
| 250.60 | Diabetes with neurological manifestations, Type II [non-insulin dependent type][NIDDM type][adult-onset type] or unspecified type ,not stated as uncontrolled | E11.43 | Type 2 diabetes mellitus with diabetic autonomic (poly)neuropathy          |
| 250.60 | Diabetes with neurological manifestations, Type II [non-insulin dependent type][NIDDM type][adult-onset type] or unspecified type ,not stated as uncontrolled | E11.44 | Type 2 diabetes mellitus with diabetic amyotrophy                          |
| 250.60 | Diabetes with neurological manifestations, Type II [non-insulin dependent type][NIDDM type][adult-onset type] or unspecified type ,not stated as uncontrolled | E11.49 | Type 2 diabetes mellitus with other diabetic neurological complication     |
| 250.60 | Diabetes with neurological manifestations, Type II [non-insulin dependent type][NIDDM type][adult-onset type] or unspecified type ,not stated as uncontrolled | E13.40 | Other specified diabetes mellitus with diabetic neuropathy, unspecified    |
| 250.60 | Diabetes with neurological manifestations, Type II [non-insulin dependent type][NIDDM type][adult-onset type] or unspecified type ,not stated as uncontrolled | E13.41 | Other specified diabetes mellitus with diabetic mononeuropathy             |
| 250.60 | Diabetes with neurological manifestations, Type II [non-insulin dependent type][NIDDM type][adult-onset type] or unspecified type ,not stated as uncontrolled | E13.42 | Other specified diabetes mellitus with diabetic polyneuropathy             |
| 250.60 | Diabetes with neurological manifestations, Type II [non-insulin dependent type][NIDDM type][adult-onset type] or unspecified type ,not stated as uncontrolled | E13.43 | Other specified diabetes mellitus with diabetic autonomic (poly)neuropathy |
| 250.60 | Diabetes with neurological manifestations, Type II [non-insulin dependent type][NIDDM type][adult-                                                            | E13.44 | Other specified diabetes mellitus with diabetic amyotrophy                 |

|  |        |                                                                                                                                                               |         |                                                                                 |
|--|--------|---------------------------------------------------------------------------------------------------------------------------------------------------------------|---------|---------------------------------------------------------------------------------|
|  |        | onset type] or unspecified type ,not stated as uncontrolled                                                                                                   |         |                                                                                 |
|  | 250.60 | Diabetes with neurological manifestations, Type II [non-insulin dependent type][NIDDM type][adult-onset type] or unspecified type ,not stated as uncontrolled | E13.49  | Other specified diabetes mellitus with other diabetic neurological complication |
|  | 250.61 | Diabetes with neurological manifestations, Type I [insulin dependent type][IDDM][juvenile type], not stated as uncontrolled                                   | E10.40  | Type 1 diabetes mellitus with diabetic neuropathy, unspecified                  |
|  | 250.61 | Diabetes with neurological manifestations, Type I [insulin dependent type][IDDM][juvenile type], not stated as uncontrolled                                   | E10.41  | Type 1 diabetes mellitus with diabetic mononeuropathy                           |
|  | 250.61 | Diabetes with neurological manifestations, Type I [insulin dependent type][IDDM][juvenile type], not stated as uncontrolled                                   | E10.44  | Type 1 diabetes mellitus with diabetic amyotrophy                               |
|  | 250.61 | Diabetes with neurological manifestations, Type I [insulin dependent type][IDDM][juvenile type], not stated as uncontrolled                                   | E10.49  | Type 1 diabetes mellitus with other diabetic neurological complication          |
|  | 250.61 | Diabetes with neurological manifestations, Type I [insulin dependent type][IDDM][juvenile type], not stated as uncontrolled                                   | E10.610 | Type 1 diabetes mellitus with diabetic neuropathic arthropathy                  |
|  | 250.62 | Diabetes with neurological manifestations, Type II [non-insulin dependent type][NIDDM type][adult-onset type] or unspecified type, uncontrolled               | E11.40  | Type 2 diabetes mellitus with diabetic neuropathy, unspecified                  |
|  | 250.62 | Diabetes with neurological manifestations, Type II [non-insulin dependent type][NIDDM type][adult-onset type] or unspecified type, uncontrolled               | E11.41  | Type 2 diabetes mellitus with diabetic mononeuropathy                           |
|  | 250.62 | Diabetes with neurological manifestations, Type II [non-insulin dependent type][NIDDM type][adult-onset type] or unspecified type, uncontrolled               | E11.42  | Type 2 diabetes mellitus with diabetic polyneuropathy                           |
|  | 250.62 | Diabetes with neurological manifestations, Type II [non-insulin dependent type][NIDDM type][adult-onset type] or unspecified type, uncontrolled               | E11.43  | Type 2 diabetes mellitus with diabetic autonomic (poly)neuropathy               |
|  | 250.62 | Diabetes with neurological manifestations, Type II [non-insulin dependent type][NIDDM type][adult-onset type] or unspecified type, uncontrolled               | E11.44  | Type 2 diabetes mellitus with diabetic amyotrophy                               |
|  | 250.62 | Diabetes with neurological manifestations, Type II [non-insulin dependent type][NIDDM type][adult-onset type] or unspecified type, uncontrolled               | E11.49  | Type 2 diabetes mellitus with other diabetic neurological complication          |
|  | 250.62 | Diabetes with neurological manifestations, Type II [non-insulin dependent type][NIDDM type][adult-onset type] or unspecified type, uncontrolled               | E11.65  | Type 2 diabetes mellitus with hyperglycemia                                     |



|  |        |                                                                                                                                                                    |        |                                                                                                    |
|--|--------|--------------------------------------------------------------------------------------------------------------------------------------------------------------------|--------|----------------------------------------------------------------------------------------------------|
|  | 250.63 | Diabetes with neurological manifestations, Type I [insulin dependent type][IDDM][juvenile type], uncontrolled                                                      | E10.40 | Type 1 diabetes mellitus with diabetic neuropathy, unspecified                                     |
|  | 250.63 | Diabetes with neurological manifestations, Type I [insulin dependent type][IDDM][juvenile type], uncontrolled                                                      | E10.65 | Type 1 diabetes mellitus with hyperglycemia                                                        |
|  | 250.70 | Diabetes with peripheral circulatory disorders, Type II [non-insulin dependent type][NIDDM type][adult-onset type] or unspecified type ,not stated as uncontrolled | E08.51 | Diabetes mellitus due to underlying condition with diabetic peripheral angiopathy without gangrene |
|  | 250.70 | Diabetes with peripheral circulatory disorders, Type II [non-insulin dependent type][NIDDM type][adult-onset type] or unspecified type ,not stated as uncontrolled | E08.52 | Diabetes mellitus due to underlying condition with diabetic peripheral angiopathy with gangrene    |
|  | 250.70 | Diabetes with peripheral circulatory disorders, Type II [non-insulin dependent type][NIDDM type][adult-onset type] or unspecified type ,not stated as uncontrolled | E08.59 | Diabetes mellitus due to underlying condition with other circulatory complications                 |
|  | 250.70 | Diabetes with peripheral circulatory disorders, Type II [non-insulin dependent type][NIDDM type][adult-onset type] or unspecified type ,not stated as uncontrolled | E09.51 | Drug or chemical induced diabetes mellitus with diabetic peripheral angiopathy without gangrene    |
|  | 250.70 | Diabetes with peripheral circulatory disorders, Type II [non-insulin dependent type][NIDDM type][adult-onset type] or unspecified type ,not stated as uncontrolled | E09.52 | Drug or chemical induced diabetes mellitus with diabetic peripheral angiopathy with gangrene       |
|  | 250.70 | Diabetes with peripheral circulatory disorders, Type II [non-insulin dependent type][NIDDM type][adult-onset type] or unspecified type ,not stated as uncontrolled | E09.59 | Drug or chemical induced diabetes mellitus with other circulatory complications                    |
|  | 250.70 | Diabetes with peripheral circulatory disorders, Type II [non-insulin dependent type][NIDDM type][adult-onset type] or unspecified type ,not stated as uncontrolled | E11.51 | Type 2 diabetes mellitus with diabetic peripheral angiopathy without gangrene                      |
|  | 250.70 | Diabetes with peripheral circulatory disorders, Type II [non-insulin dependent type][NIDDM type][adult-onset type] or unspecified type ,not stated as uncontrolled | E11.52 | Type 2 diabetes mellitus with diabetic peripheral angiopathy with gangrene                         |
|  | 250.70 | Diabetes with peripheral circulatory disorders, Type II [non-insulin dependent type][NIDDM type][adult-onset type] or unspecified type ,not stated as uncontrolled | E11.59 | Type 2 diabetes mellitus with other circulatory complications                                      |

|        |                                                                                                                                                              |         |                                                                                                                  |
|--------|--------------------------------------------------------------------------------------------------------------------------------------------------------------|---------|------------------------------------------------------------------------------------------------------------------|
| 250.50 | Diabetes with ophthalmic manifestations, Type II [non-insulin dependent type][NIDDM type][adult-onset type ] or unspecified type ,not stated as uncontrolled | E13.349 | Other specified diabetes mellitus with severe nonproliferative diabetic retinopathy without macular edema        |
| 250.50 | Diabetes with ophthalmic manifestations, Type II [non-insulin dependent type][NIDDM type][adult-onset type ] or unspecified type ,not stated as uncontrolled | E13.351 | Other specified diabetes mellitus with proliferative diabetic retinopathy with macular edema                     |
| 250.50 | Diabetes with ophthalmic manifestations, Type II [non-insulin dependent type][NIDDM type][adult-onset type ] or unspecified type ,not stated as uncontrolled | E13.359 | Other specified diabetes mellitus with proliferative diabetic retinopathy without macular edema                  |
| 250.50 | Diabetes with ophthalmic manifestations, Type II [non-insulin dependent type][NIDDM type][adult-onset type ] or unspecified type ,not stated as uncontrolled | E13.36  | Other specified diabetes mellitus with diabetic cataract                                                         |
| 250.50 | Diabetes with ophthalmic manifestations, Type II [non-insulin dependent type][NIDDM type][adult-onset type ] or unspecified type ,not stated as uncontrolled | E13.39  | Other specified diabetes mellitus with other diabetic ophthalmic complication                                    |
| 250.51 | Diabetes with ophthalmic manifestations, Type I [insulin dependent type][IDDM][juvenile type], not stated as uncontrolled                                    | E10.311 | Type 1 diabetes mellitus with unspecified diabetic retinopathy with macular edema                                |
| 250.51 | Diabetes with ophthalmic manifestations, Type I [insulin dependent type][IDDM][juvenile type], not stated as uncontrolled                                    | E10.319 | Type 1 diabetes mellitus with unspecified diabetic retinopathy without macular edema                             |
| 250.51 | Diabetes with ophthalmic manifestations, Type I [insulin dependent type][IDDM][juvenile type], not stated as uncontrolled                                    | E10.36  | Type 1 diabetes mellitus with diabetic cataract                                                                  |
| 250.51 | Diabetes with ophthalmic manifestations, Type I [insulin dependent type][IDDM][juvenile type], not stated as uncontrolled                                    | E10.39  | Type 1 diabetes mellitus with other diabetic ophthalmic complication                                             |
| 250.52 | Diabetes with ophthalmic manifestations, Type II [non-insulin dependent type][NIDDM type][adult-onset type ] or unspecified type, uncontrolled               | E08.311 | Diabetes mellitus due to underlying condition with unspecified diabetic retinopathy with macular edema           |
| 250.52 | Diabetes with ophthalmic manifestations, Type II [non-insulin dependent type][NIDDM type][adult-onset type ] or unspecified type, uncontrolled               | E08.319 | Diabetes mellitus due to underlying condition with unspecified diabetic retinopathy without macular edema        |
| 250.52 | Diabetes with ophthalmic manifestations, Type II [non-insulin dependent type][NIDDM type][adult-onset type ] or unspecified type, uncontrolled               | E08.321 | Diabetes mellitus due to underlying condition with mild nonproliferative diabetic retinopathy with macular edema |

|        |                                                                                                                                                |         |                                                                                                                         |
|--------|------------------------------------------------------------------------------------------------------------------------------------------------|---------|-------------------------------------------------------------------------------------------------------------------------|
| 250.52 | Diabetes with ophthalmic manifestations, Type II [non-insulin dependent type][NIDDM type][adult-onset type ] or unspecified type, uncontrolled | E08.329 | Diabetes mellitus due to underlying condition with mild nonproliferative diabetic retinopathy without macular edema     |
| 250.52 | Diabetes with ophthalmic manifestations, Type II [non-insulin dependent type][NIDDM type][adult-onset type ] or unspecified type, uncontrolled | E08.331 | Diabetes mellitus due to underlying condition with moderate nonproliferative diabetic retinopathy with macular edema    |
| 250.52 | Diabetes with ophthalmic manifestations, Type II [non-insulin dependent type][NIDDM type][adult-onset type ] or unspecified type, uncontrolled | E08.339 | Diabetes mellitus due to underlying condition with moderate nonproliferative diabetic retinopathy without macular edema |
| 250.52 | Diabetes with ophthalmic manifestations, Type II [non-insulin dependent type][NIDDM type][adult-onset type ] or unspecified type, uncontrolled | E08.341 | Diabetes mellitus due to underlying condition with severe nonproliferative diabetic retinopathy with macular edema      |
| 250.52 | Diabetes with ophthalmic manifestations, Type II [non-insulin dependent type][NIDDM type][adult-onset type ] or unspecified type, uncontrolled | E08.349 | Diabetes mellitus due to underlying condition with severe nonproliferative diabetic retinopathy without macular edema   |
| 250.52 | Diabetes with ophthalmic manifestations, Type II [non-insulin dependent type][NIDDM type][adult-onset type ] or unspecified type, uncontrolled | E08.351 | Diabetes mellitus due to underlying condition with proliferative diabetic retinopathy with macular edema                |
| 250.52 | Diabetes with ophthalmic manifestations, Type II [non-insulin dependent type][NIDDM type][adult-onset type ] or unspecified type, uncontrolled | E08.359 | Diabetes mellitus due to underlying condition with proliferative diabetic retinopathy without macular edema             |
| 250.52 | Diabetes with ophthalmic manifestations, Type II [non-insulin dependent type][NIDDM type][adult-onset type ] or unspecified type, uncontrolled | E08.36  | Diabetes mellitus due to underlying condition with diabetic cataract                                                    |
| 250.52 | Diabetes with ophthalmic manifestations, Type II [non-insulin dependent type][NIDDM type][adult-onset type ] or unspecified type, uncontrolled | E08.39  | Diabetes mellitus due to underlying condition with other diabetic ophthalmic complication                               |
| 250.52 | Diabetes with ophthalmic manifestations, Type II [non-insulin dependent type][NIDDM type][adult-onset type ] or unspecified type, uncontrolled | E08.39  | Diabetes mellitus due to underlying condition with other diabetic ophthalmic complication                               |
| 250.52 | Diabetes with ophthalmic manifestations, Type II [non-insulin dependent type][NIDDM type][adult-onset type ] or unspecified type, uncontrolled | E09.311 | Drug or chemical induced diabetes mellitus with unspecified diabetic retinopathy with macular edema                     |
| 250.52 | Diabetes with ophthalmic manifestations, Type II [non-insulin dependent type][NIDDM type][adult-onset type ] or unspecified type, uncontrolled | E09.319 | Drug or chemical induced diabetes mellitus with unspecified diabetic retinopathy without macular edema                  |
| 250.52 | Diabetes with ophthalmic manifestations, Type II [non-insulin dependent type][NIDDM type][adult-onset type ] or unspecified type, uncontrolled | E09.321 | Drug or chemical induced diabetes mellitus with mild nonproliferative diabetic retinopathy with macular edema           |
| 250.52 | Diabetes with ophthalmic manifestations, Type II [non-insulin dependent type][NIDDM type][adult-onset type ] or unspecified type, uncontrolled | E09.329 | Drug or chemical induced diabetes mellitus with mild nonproliferative diabetic retinopathy without macular edema        |

|  |        |                                                                                                                                                |         |                                                                                                                      |
|--|--------|------------------------------------------------------------------------------------------------------------------------------------------------|---------|----------------------------------------------------------------------------------------------------------------------|
|  | 250.52 | Diabetes with ophthalmic manifestations, Type II [non-insulin dependent type][NIDDM type][adult-onset type ] or unspecified type, uncontrolled | E09.331 | Drug or chemical induced diabetes mellitus with moderate nonproliferative diabetic retinopathy with macular edema    |
|  | 250.52 | Diabetes with ophthalmic manifestations, Type II [non-insulin dependent type][NIDDM type][adult-onset type ] or unspecified type, uncontrolled | E09.339 | Drug or chemical induced diabetes mellitus with moderate nonproliferative diabetic retinopathy without macular edema |
|  | 250.52 | Diabetes with ophthalmic manifestations, Type II [non-insulin dependent type][NIDDM type][adult-onset type ] or unspecified type, uncontrolled | E09.341 | Drug or chemical induced diabetes mellitus with severe nonproliferative diabetic retinopathy with macular edema      |
|  | 250.52 | Diabetes with ophthalmic manifestations, Type II [non-insulin dependent type][NIDDM type][adult-onset type ] or unspecified type, uncontrolled | E09.349 | Drug or chemical induced diabetes mellitus with severe nonproliferative diabetic retinopathy without macular edema   |
|  | 250.52 | Diabetes with ophthalmic manifestations, Type II [non-insulin dependent type][NIDDM type][adult-onset type ] or unspecified type, uncontrolled | E09.351 | Drug or chemical induced diabetes mellitus with proliferative diabetic retinopathy with macular edema                |
|  | 250.52 | Diabetes with ophthalmic manifestations, Type II [non-insulin dependent type][NIDDM type][adult-onset type ] or unspecified type, uncontrolled | E09.359 | Drug or chemical induced diabetes mellitus with proliferative diabetic retinopathy without macular edema             |
|  | 250.52 | Diabetes with ophthalmic manifestations, Type II [non-insulin dependent type][NIDDM type][adult-onset type ] or unspecified type, uncontrolled | E09.36  | Drug or chemical induced diabetes mellitus with diabetic cataract                                                    |
|  | 250.52 | Diabetes with ophthalmic manifestations, Type II [non-insulin dependent type][NIDDM type][adult-onset type ] or unspecified type, uncontrolled | E09.39  | Drug or chemical induced diabetes mellitus with other diabetic ophthalmic complication                               |
|  | 250.52 | Diabetes with ophthalmic manifestations, Type II [non-insulin dependent type][NIDDM type][adult-onset type ] or unspecified type, uncontrolled | E09.39  | Drug or chemical induced diabetes mellitus with other diabetic ophthalmic complication                               |
|  | 250.52 | Diabetes with ophthalmic manifestations, Type II [non-insulin dependent type][NIDDM type][adult-onset type ] or unspecified type, uncontrolled | E11.311 | Type 2 diabetes mellitus with unspecified diabetic retinopathy with macular edema                                    |
|  | 357.2  | Polyneuropathy in diabetes                                                                                                                     | E08.42  | Diabetes mellitus due to underlying condition with diabetic polyneuropathy                                           |
|  | 357.2  | Polyneuropathy in diabetes                                                                                                                     | E09.42  | Drug or chemical induced diabetes mellitus with neurological complications with diabetic polyneuropathy              |
|  | 357.2  | Polyneuropathy in diabetes                                                                                                                     | E10.40  | Type 1 diabetes mellitus with diabetic neuropathy, unspecified                                                       |
|  | 357.2  | Polyneuropathy in diabetes                                                                                                                     | E10.42  | Type 1 diabetes mellitus with diabetic polyneuropathy                                                                |
|  | 357.2  | Polyneuropathy in diabetes                                                                                                                     | E11.40  | Type 2 diabetes mellitus with diabetic neuropathy, unspecified                                                       |

|  |        |                                                                                                                                                                    |         |                                                                                                    |
|--|--------|--------------------------------------------------------------------------------------------------------------------------------------------------------------------|---------|----------------------------------------------------------------------------------------------------|
|  | 357.2  | Polyneuropathy in diabetes                                                                                                                                         | E11.42  | Type 2 diabetes mellitus with diabetic polyneuropathy                                              |
|  | 357.2  | Polyneuropathy in diabetes                                                                                                                                         | E13.42  | Other specified diabetes mellitus with diabetic polyneuropathy                                     |
|  | 362.01 | Background diabetic retinopathy                                                                                                                                    | E11.311 | Type 2 diabetes mellitus with unspecified diabetic retinopathy with macular edema                  |
|  | 362.01 | Background diabetic retinopathy                                                                                                                                    | E11.319 | Type 2 diabetes mellitus with unspecified diabetic retinopathy without macular edema               |
|  | 362.01 | Background diabetic retinopathy                                                                                                                                    | E11.321 | Type 2 diabetes mellitus with mild nonproliferative diabetic retinopathy with macular edema        |
|  | 362.01 | Background diabetic retinopathy                                                                                                                                    | E11.329 | Type 2 diabetes mellitus with mild nonproliferative diabetic retinopathy without macular edema     |
|  | 362.01 | Background diabetic retinopathy                                                                                                                                    | E11.331 | Type 2 diabetes mellitus with moderate nonproliferative diabetic retinopathy with macular edema    |
|  | 362.01 | Background diabetic retinopathy                                                                                                                                    | E11.339 | Type 2 diabetes mellitus with moderate nonproliferative diabetic retinopathy without macular edema |
|  | 362.01 | Background diabetic retinopathy                                                                                                                                    | E11.341 | Type 2 diabetes mellitus with severe nonproliferative diabetic retinopathy with macular edema      |
|  | 362.01 | Background diabetic retinopathy                                                                                                                                    | E11.349 | Type 2 diabetes mellitus with severe nonproliferative diabetic retinopathy without macular edema   |
|  | 362.02 | Proliferative diabetic retinopathy                                                                                                                                 | E11.351 | Type 2 diabetes mellitus with proliferative diabetic retinopathy with macular edema                |
|  | 362.02 | Proliferative diabetic retinopathy                                                                                                                                 | E11.359 | Type 2 diabetes mellitus with proliferative diabetic retinopathy without macular edema             |
|  | 366.41 | Diabetic cataract                                                                                                                                                  | E08.36  | Diabetes mellitus due to underlying condition with diabetic cataract                               |
|  | 366.41 | Diabetic cataract                                                                                                                                                  | E09.36  | Drug or chemical induced diabetes mellitus with diabetic cataract                                  |
|  | 366.41 | Diabetic cataract                                                                                                                                                  | E10.36  | Type 1 diabetes mellitus with diabetic cataract                                                    |
|  | 366.41 | Diabetic cataract                                                                                                                                                  | E11.36  | Type 2 diabetes mellitus with diabetic cataract                                                    |
|  | 366.41 | Diabetic cataract                                                                                                                                                  | E13.36  | Other specified diabetes mellitus with diabetic cataract                                           |
|  | 250.70 | Diabetes with peripheral circulatory disorders, Type II [non-insulin dependent type][NIDDM type][adult-onset type] or unspecified type ,not stated as uncontrolled | E13.51  | Other specified diabetes mellitus with diabetic peripheral angiopathy without gangrene             |
|  | 250.70 | Diabetes with peripheral circulatory disorders, Type II [non-insulin dependent type][NIDDM type][adult-                                                            | E13.52  | Other specified diabetes mellitus with diabetic peripheral angiopathy with gangrene                |

|  |        |                                                                                                                                                                    |         |                                                                               |
|--|--------|--------------------------------------------------------------------------------------------------------------------------------------------------------------------|---------|-------------------------------------------------------------------------------|
|  |        | onset type] or unspecified type ,not stated as uncontrolled                                                                                                        |         |                                                                               |
|  | 250.70 | Diabetes with peripheral circulatory disorders, Type II [non-insulin dependent type][NIDDM type][adult-onset type] or unspecified type ,not stated as uncontrolled | E13.59  | Other specified diabetes mellitus with other circulatory complications        |
|  | 250.71 | Diabetes with peripheral circulatory disorders, Type I [insulin dependent type][IDDM][juvenile type], not stated as uncontrolled                                   | E10.51  | Type 1 diabetes mellitus with diabetic peripheral angiopathy without gangrene |
|  | 250.71 | Diabetes with peripheral circulatory disorders, Type I [insulin dependent type][IDDM][juvenile type], not stated as uncontrolled                                   | E10.52  | Type 1 diabetes mellitus with diabetic peripheral angiopathy with gangrene    |
|  | 250.71 | Diabetes with peripheral circulatory disorders, Type I [insulin dependent type][IDDM][juvenile type], not stated as uncontrolled                                   | E10.59  | Type 1 diabetes mellitus with other circulatory complications                 |
|  | 250.72 | Diabetes with peripheral circulatory disorders, Type II [non-insulin dependent type][NIDDM type][adult-onset type] or unspecified type, uncontrolled               | E11.51  | Type 2 diabetes mellitus with diabetic peripheral angiopathy without gangrene |
|  | 250.72 | Diabetes with peripheral circulatory disorders, Type II [non-insulin dependent type][NIDDM type][adult-onset type] or unspecified type, uncontrolled               | E11.52  | Type 2 diabetes mellitus with diabetic peripheral angiopathy with gangrene    |
|  | 250.72 | Diabetes with peripheral circulatory disorders, Type II [non-insulin dependent type][NIDDM type][adult-onset type] or unspecified type, uncontrolled               | E11.59  | Type 2 diabetes mellitus with other circulatory complications                 |
|  | 250.72 | Diabetes with peripheral circulatory disorders, Type II [non-insulin dependent type][NIDDM type][adult-onset type] or unspecified type, uncontrolled               | E11.65  | Type 2 diabetes mellitus with hyperglycemia                                   |
|  | 250.73 | Diabetes with peripheral circulatory disorders, Type I [insulin dependent type][IDDM][juvenile type], uncontrolled                                                 | E10.51  | Type 1 diabetes mellitus with diabetic peripheral angiopathy without gangrene |
|  | 250.73 | Diabetes with peripheral circulatory disorders, Type I [insulin dependent type][IDDM][juvenile type], uncontrolled                                                 | E10.65  | Type 1 diabetes mellitus with hyperglycemia                                   |
|  | 250.80 | Diabetes with other specified manifestations, Type II [non-insulin dependent type][NIDDM type][adult-onset type] or unspecified type, not stated as uncontrolled   | E11.610 | Type 2 diabetes mellitus with diabetic neuropathic arthropathy                |
|  | 250.80 | Diabetes with other specified manifestations, Type II [non-insulin dependent type][NIDDM type][adult-onset type] or unspecified type, not stated as uncontrolled   | E11.618 | Type 2 diabetes mellitus with other diabetic arthropathy                      |

|        |                                                                                                                                                                  |         |                                                            |
|--------|------------------------------------------------------------------------------------------------------------------------------------------------------------------|---------|------------------------------------------------------------|
| 250.80 | Diabetes with other specified manifestations, Type II [non-insulin dependent type][NIDDM type][adult-onset type] or unspecified type, not stated as uncontrolled | E11.620 | Type 2 diabetes mellitus with diabetic dermatitis          |
| 250.80 | Diabetes with other specified manifestations, Type II [non-insulin dependent type][NIDDM type][adult-onset type] or unspecified type, not stated as uncontrolled | E11.621 | Type 2 diabetes mellitus with foot ulcer                   |
| 250.80 | Diabetes with other specified manifestations, Type II [non-insulin dependent type][NIDDM type][adult-onset type] or unspecified type, not stated as uncontrolled | E11.622 | Type 2 diabetes mellitus with other skin ulcer             |
| 250.80 | Diabetes with other specified manifestations, Type II [non-insulin dependent type][NIDDM type][adult-onset type] or unspecified type, not stated as uncontrolled | E11.628 | Type 2 diabetes mellitus with other skin complications     |
| 250.80 | Diabetes with other specified manifestations, Type II [non-insulin dependent type][NIDDM type][adult-onset type] or unspecified type, not stated as uncontrolled | E11.630 | Type 2 diabetes mellitus with periodontal disease          |
| 250.80 | Diabetes with other specified manifestations, Type II [non-insulin dependent type][NIDDM type][adult-onset type] or unspecified type, not stated as uncontrolled | E11.638 | Type 2 diabetes mellitus with other oral complications     |
| 250.80 | Diabetes with other specified manifestations, Type II [non-insulin dependent type][NIDDM type][adult-onset type] or unspecified type, not stated as uncontrolled | E11.649 | Type 2 diabetes mellitus with hypoglycemia without coma    |
| 250.80 | Diabetes with other specified manifestations, Type II [non-insulin dependent type][NIDDM type][adult-onset type] or unspecified type, not stated as uncontrolled | E11.65  | Type 2 diabetes mellitus with hyperglycemia                |
| 250.80 | Diabetes with other specified manifestations, Type II [non-insulin dependent type][NIDDM type][adult-onset type] or unspecified type, not stated as uncontrolled | E11.69  | Type 2 diabetes mellitus with other specified complication |
| 250.81 | Diabetes with other specified manifestations, Type I [insulin dependent type][IDDM][juvenile type], not stated as uncontrolled                                   | E10.618 | Type 1 diabetes mellitus with other diabetic arthropathy   |
| 250.81 | Diabetes with other specified manifestations, Type I [insulin dependent type][IDDM][juvenile type], not stated as uncontrolled                                   | E10.620 | Type 1 diabetes mellitus with diabetic dermatitis          |

|        |                                                                                                                                                            |         |                                                                              |
|--------|------------------------------------------------------------------------------------------------------------------------------------------------------------|---------|------------------------------------------------------------------------------|
| 250.81 | Diabetes with other specified manifestations, Type I [insulin dependent type][IDDM][juvenile type], not stated as uncontrolled                             | E10.621 | Type 1 diabetes mellitus with foot ulcer                                     |
| 250.81 | Diabetes with other specified manifestations, Type I [insulin dependent type][IDDM][juvenile type], not stated as uncontrolled                             | E10.622 | Type 1 diabetes mellitus with other skin ulcer                               |
| 250.81 | Diabetes with other specified manifestations, Type I [insulin dependent type][IDDM][juvenile type], not stated as uncontrolled                             | E10.628 | Type 1 diabetes mellitus with other skin complications                       |
| 250.81 | Diabetes with other specified manifestations, Type I [insulin dependent type][IDDM][juvenile type], not stated as uncontrolled                             | E10.630 | Type 1 diabetes mellitus with periodontal disease                            |
| 250.81 | Diabetes with other specified manifestations, Type I [insulin dependent type][IDDM][juvenile type], not stated as uncontrolled                             | E10.638 | Type 1 diabetes mellitus with other oral complications                       |
| 250.81 | Diabetes with other specified manifestations, Type I [insulin dependent type][IDDM][juvenile type], not stated as uncontrolled                             | E10.649 | Type 1 diabetes mellitus with hypoglycemia without coma                      |
| 250.81 | Diabetes with other specified manifestations, Type I [insulin dependent type][IDDM][juvenile type], not stated as uncontrolled                             | E10.65  | Type 1 diabetes mellitus with hyperglycemia                                  |
| 250.81 | Diabetes with other specified manifestations, Type I [insulin dependent type][IDDM][juvenile type], not stated as uncontrolled                             | E10.69  | Type 1 diabetes mellitus with other specified complication                   |
| 250.82 | Diabetes with other specified manifestations, Type II [non-insulin dependent type][NIDDM type][adult-onset type] or unspecified type, uncontrolled         | E11.65  | Type 2 diabetes mellitus with hyperglycemia                                  |
| 250.82 | Diabetes with other specified manifestations, Type II [non-insulin dependent type][NIDDM type][adult-onset type] or unspecified type, uncontrolled         | E11.69  | Type 2 diabetes mellitus with other specified complication                   |
| 250.83 | Diabetes with other specified manifestations, Type I [insulin dependent type][IDDM][juvenile type], uncontrolled                                           | E10.65  | Type 1 diabetes mellitus with hyperglycemia                                  |
| 250.83 | Diabetes with other specified manifestations, Type I [insulin dependent type][IDDM][juvenile type], uncontrolled                                           | E10.69  | Type 1 diabetes mellitus with other specified complication                   |
| 250.90 | Diabetes with unspecified complication, Type II [non-insulin dependent type][NIDDM type][adult-onset type] or unspecified type, not stated as uncontrolled | E08.8   | Diabetes mellitus due to underlying condition with unspecified complications |
| 250.90 | Diabetes with unspecified complication, Type II [non-insulin dependent type][NIDDM type][adult-onset type] or unspecified type, not stated as uncontrolled | E09.8   | Drug or chemical induced diabetes mellitus with unspecified complications    |



|  |        |                                                                                                                                                            |        |                                                                                                                               |
|--|--------|------------------------------------------------------------------------------------------------------------------------------------------------------------|--------|-------------------------------------------------------------------------------------------------------------------------------|
|  | 250.90 | Diabetes with unspecified complication, Type II [non-insulin dependent type][NIDDM type][adult-onset type] or unspecified type, not stated as uncontrolled | E11.8  | Type 2 diabetes mellitus with unspecified complications                                                                       |
|  | 250.90 | Diabetes with unspecified complication, Type II [non-insulin dependent type][NIDDM type][adult-onset type] or unspecified type, not stated as uncontrolled | E13.8  | Other specified diabetes mellitus with unspecified complications                                                              |
|  | 250.91 | Diabetes with unspecified complication, Type I [insulin dependent type][IDDM][juvenile type], not stated as uncontrolled                                   | E10.8  | Type 1 diabetes mellitus with unspecified complications                                                                       |
|  | 250.92 | Diabetes with unspecified complication, Type II [non-insulin dependent type][NIDDM type][adult-onset type] or unspecified type, uncontrolled               | E11.65 | Type 2 diabetes mellitus with hyperglycemia                                                                                   |
|  | 250.92 | Diabetes with unspecified complication, Type II [non-insulin dependent type][NIDDM type][adult-onset type] or unspecified type, uncontrolled               | E11.8  | Type 2 diabetes mellitus with unspecified complications                                                                       |
|  | 250.93 | Diabetes with unspecified complication, Type I [insulin dependent type][IDDM][juvenile type], uncontrolled                                                 | E10.65 | Type 1 diabetes mellitus with hyperglycemia                                                                                   |
|  | 250.93 | Diabetes with unspecified complication, Type I [insulin dependent type][IDDM][juvenile type], uncontrolled                                                 | E10.8  | Type 1 diabetes mellitus with unspecified complications                                                                       |
|  | 251.8  | Other specified disorders of pancreatic internal secretion                                                                                                 | E08.00 | Diabetes mellitus due to underlying condition with hyperosmolarity without nonketotic hyperglycemic-hyperosmolar coma (NKHHC) |
|  | 251.8  | Other specified disorders of pancreatic internal secretion                                                                                                 | E08.59 | Diabetes mellitus due to underlying condition with other circulatory complications                                            |
|  | 251.8  | Other specified disorders of pancreatic internal secretion                                                                                                 | E09.00 | Drug or chemical induced diabetes mellitus with hyperosmolarity without nonketotic hyperglycemic-hyperosmolar coma (NKHHC)    |
|  | 251.8  | Other specified disorders of pancreatic internal secretion                                                                                                 | E09.59 | Drug or chemical induced diabetes mellitus with other circulatory complications                                               |
|  | 251.8  | Other specified disorders of pancreatic internal secretion                                                                                                 | E13.00 | Other specified diabetes mellitus with hyperosmolarity without nonketotic hyperglycemic-hyperosmolar coma (NKHHC)             |
|  | 251.8  | Other specified disorders of pancreatic internal secretion                                                                                                 | E13.01 | Other specified diabetes mellitus with hyperosmolarity with coma                                                              |
|  | 251.8  | Other specified disorders of pancreatic internal secretion                                                                                                 | E13.10 | Other specified diabetes mellitus with ketoacidosis without coma                                                              |
|  | 251.8  | Other specified disorders of pancreatic internal secretion                                                                                                 | E13.11 | Other specified diabetes mellitus with ketoacidosis with coma                                                                 |
|  | 251.8  | Other specified disorders of pancreatic internal secretion                                                                                                 | E13.21 | Other specified diabetes mellitus with diabetic nephropathy                                                                   |

|  |       |                                                            |         |                                                                                 |
|--|-------|------------------------------------------------------------|---------|---------------------------------------------------------------------------------|
|  | 251.8 | Other specified disorders of pancreatic internal secretion | E13.22  | Other specified diabetes mellitus with diabetic chronic kidney disease          |
|  | 251.8 | Other specified disorders of pancreatic internal secretion | E13.29  | Other specified diabetes mellitus with other diabetic kidney complication       |
|  | 251.8 | Other specified disorders of pancreatic internal secretion | E13.39  | Other specified diabetes mellitus with other diabetic ophthalmic complication   |
|  | 251.8 | Other specified disorders of pancreatic internal secretion | E13.40  | Other specified diabetes mellitus with diabetic neuropathy, unspecified         |
|  | 251.8 | Other specified disorders of pancreatic internal secretion | E13.41  | Other specified diabetes mellitus with diabetic mononeuropathy                  |
|  | 251.8 | Other specified disorders of pancreatic internal secretion | E13.42  | Other specified diabetes mellitus with diabetic polyneuropathy                  |
|  | 251.8 | Other specified disorders of pancreatic internal secretion | E13.43  | Other specified diabetes mellitus with diabetic autonomic (poly)neuropathy      |
|  | 251.8 | Other specified disorders of pancreatic internal secretion | E13.44  | Other specified diabetes mellitus with diabetic amyotrophy                      |
|  | 251.8 | Other specified disorders of pancreatic internal secretion | E13.49  | Other specified diabetes mellitus with other diabetic neurological complication |
|  | 251.8 | Other specified disorders of pancreatic internal secretion | E13.59  | Other specified diabetes mellitus with other circulatory complications          |
|  | 251.8 | Other specified disorders of pancreatic internal secretion | E13.620 | Other specified diabetes mellitus with diabetic dermatitis                      |
|  | 251.8 | Other specified disorders of pancreatic internal secretion | E13.621 | Other specified diabetes mellitus with foot ulcer                               |
|  | 251.8 | Other specified disorders of pancreatic internal secretion | E13.622 | Other specified diabetes mellitus with other skin ulcer                         |
|  | 251.8 | Other specified disorders of pancreatic internal secretion | E13.628 | Other specified diabetes mellitus with other skin complications                 |
|  | 251.8 | Other specified disorders of pancreatic internal secretion | E13.638 | Other specified diabetes mellitus with other oral complications                 |
|  | 251.8 | Other specified disorders of pancreatic internal secretion | E13.641 | Other specified diabetes mellitus with hypoglycemia with coma                   |
|  | 251.8 | Other specified disorders of pancreatic internal secretion | E13.649 | Other specified diabetes mellitus with hypoglycemia without coma                |
|  | 251.8 | Other specified disorders of pancreatic internal secretion | E13.65  | Other specified diabetes mellitus with hyperglycemia                            |
|  | 251.8 | Other specified disorders of pancreatic internal secretion | E13.69  | Other specified diabetes mellitus with other specified complication             |
|  | 251.8 | Other specified disorders of pancreatic internal secretion | E13.8   | Other specified diabetes mellitus with unspecified complications                |
|  | 251.8 | Other specified disorders of pancreatic internal secretion | E13.9   | Other specified diabetes mellitus without complications                         |

|                             |        |                                                                                                |         |                                                                                          |
|-----------------------------|--------|------------------------------------------------------------------------------------------------|---------|------------------------------------------------------------------------------------------|
|                             | 253.5  | Diabetes insipidus                                                                             | E23.2   | Diabetes insipidus                                                                       |
|                             | 583.81 | Nephritis and nephropathy, not specified as acute or chronic, in diseases classified elsewhere | E10.21  | Type 1 diabetes mellitus with diabetic nephropathy                                       |
|                             | 583.81 | Nephritis and nephropathy, not specified as acute or chronic, in diseases classified elsewhere | E11.21  | Type 2 diabetes mellitus with diabetic nephropathy                                       |
| 3. Congestive heart failure | ICD-9  | ICD-9-CM Diagnosis Labeling                                                                    | ICD-10  | ICD-10-PCS Diagnosis Labeling                                                            |
|                             | 402.01 | Malignant hypertensive heart disease with heart failure                                        | I50.1   | Left ventricular failure                                                                 |
|                             | 402.11 | Benign hypertensive heart disease with heart failure                                           | I50.20  | Unspecified systolic (congestive) heart failure                                          |
|                             | 402.91 | Unspecified hypertensive heart disease with heart failure                                      | I50.21  | Acute systolic (congestive) heart failure                                                |
|                             | 404.01 | Malignant hypertensive heart and renal disease with heart failure                              | I50.22  | Chronic systolic (congestive) heart failure                                              |
|                             | 404.03 | Malignant hypertensive heart and renal disease with heart failure and renal failure            | I50.23  | Acute on chronic systolic (congestive) heart failure                                     |
|                             | 404.11 | Benign hypertensive heart and renal disease with heart failure                                 | I50.30  | Unspecified diastolic (congestive) heart failure                                         |
|                             | 404.13 | Benign hypertensive heart and renal disease with heart failure and renal failure               | I50.31  | Acute diastolic (congestive) heart failure                                               |
|                             | 404.91 | Unspecified hypertensive heart and renal disease with heart failure                            | I50.32  | Chronic diastolic (congestive) heart failure                                             |
|                             | 404.93 | Unspecified hypertensive heart and renal disease with heart failure and renal failure          | I50.33  | Acute on chronic diastolic (congestive) heart failure                                    |
|                             | 428.0  | Congestive heart failure                                                                       | I50.40  | Unspecified combined systolic (congestive) and diastolic (congestive) heart failure      |
|                             | 428.1  | Left heart failure                                                                             | I50.41  | Acute combined systolic (congestive) and diastolic (congestive) heart failure            |
|                             | 428.9  | Unspecified heart failure                                                                      | I50.42  | Chronic combined systolic (congestive) and diastolic (congestive) heart failure          |
|                             | 398.91 | Rheumatic heart failure                                                                        | I50.43  | Acute on chronic combined systolic (congestive) and diastolic (congestive) heart failure |
| 4. Coronary artery disease  | ICD-9  | ICD-9-CM Diagnosis Labeling                                                                    | ICD-10  | ICD-10-PCS Diagnosis Labeling                                                            |
|                             | 429.2  | Cardiovascular disease, unspecified                                                            | I25.10  | Atherosclerotic heart disease of native coronary artery without angina pectoris          |
|                             | 414.00 | Coronary atherosclerosis of unspecified type vessel, native or graft                           | I25.10  | Atherosclerotic heart disease of native coronary artery without angina pectoris          |
|                             | 414.01 | Coronary atherosclerosis of native coronary artery                                             | I25.10  | Atherosclerotic heart disease of native coronary artery without angina pectoris          |
|                             | 414.01 | Coronary atherosclerosis of native coronary artery                                             | I25.110 | Atherosclerotic heart disease of native coronary artery with unstable angina pectoris    |

|  |        |                                                                   |         |                                                                                                                 |
|--|--------|-------------------------------------------------------------------|---------|-----------------------------------------------------------------------------------------------------------------|
|  | 414.01 | Coronary atherosclerosis of native coronary artery                | I25.111 | Atherosclerotic heart disease of native coronary artery with angina pectoris with documented spasm              |
|  | 414.01 | Coronary atherosclerosis of native coronary artery                | I25.118 | Atherosclerotic heart disease of native coronary artery with other forms of angina pectoris                     |
|  | 414.01 | Coronary atherosclerosis of native coronary artery                | I25.119 | Atherosclerotic heart disease of native coronary artery with unspecified angina pectoris                        |
|  | 414.11 | Aneurysm of coronary vessels                                      | I25.41  | Coronary artery aneurysm                                                                                        |
|  | 414.11 | Aneurysm of coronary vessels                                      | I25.42  | Coronary artery dissection                                                                                      |
|  | 414.05 | Coronary atherosclerosis                                          | I25.700 | Atherosclerosis of coronary artery bypass graft(s), unspecified, with unstable angina pectoris                  |
|  | 414.05 | Coronary atherosclerosis                                          | I25.701 | Atherosclerosis of coronary artery bypass graft(s), unspecified, with angina pectoris with documented spasm     |
|  | 414.05 | Coronary atherosclerosis                                          | I25.708 | Atherosclerosis of coronary artery bypass graft(s), unspecified, with other forms of angina pectoris            |
|  | 414.05 | Coronary atherosclerosis                                          | I25.709 | Atherosclerosis of coronary artery bypass graft(s), unspecified, with unspecified angina pectoris               |
|  | 414.02 | Coronary atherosclerosis of autologous vein bypass graft          | I25.710 | Atherosclerosis of autologous vein coronary artery bypass graft(s) with unstable angina pectoris                |
|  | 414.02 | Coronary atherosclerosis of autologous vein bypass graft          | I25.711 | Atherosclerosis of autologous vein coronary artery bypass graft(s) with angina pectoris with documented spasm   |
|  | 414.02 | Coronary atherosclerosis of autologous vein bypass graft          | I25.718 | Atherosclerosis of autologous vein coronary artery bypass graft(s) with other forms of angina pectoris          |
|  | 414.02 | Coronary atherosclerosis of autologous vein bypass graft          | I25.719 | Atherosclerosis of autologous vein coronary artery bypass graft(s) with unspecified angina pectoris             |
|  | 414.04 | Coronary atherosclerosis of artery bypass graft                   | I25.720 | Atherosclerosis of autologous artery coronary artery bypass graft(s) with unstable angina pectoris              |
|  | 414.04 | Coronary atherosclerosis of artery bypass graft                   | I25.721 | Atherosclerosis of autologous artery coronary artery bypass graft(s) with angina pectoris with documented spasm |
|  | 414.04 | Coronary atherosclerosis of artery bypass graft                   | I25.728 | Atherosclerosis of autologous artery coronary artery bypass graft(s) with other forms of angina pectoris        |
|  | 414.04 | Coronary atherosclerosis of artery bypass graft                   | I25.729 | Atherosclerosis of autologous artery coronary artery bypass graft(s) with unspecified angina pectoris           |
|  | 414.03 | Coronary atherosclerosis of nonautologous biological bypass graft | I25.730 | Atherosclerosis of nonautologous biological coronary artery bypass graft(s) with unstable angina pectoris       |

|  |        |                                                                      |         |                                                                                                                        |
|--|--------|----------------------------------------------------------------------|---------|------------------------------------------------------------------------------------------------------------------------|
|  | 414.05 | Coronary atherosclerosis                                             | I25.730 | Atherosclerosis of nonautologous biological coronary artery bypass graft(s) with unstable angina pectoris              |
|  | 414.03 | Coronary atherosclerosis of nonautologous biological bypass graft    | I25.731 | Atherosclerosis of nonautologous biological coronary artery bypass graft(s) with angina pectoris with documented spasm |
|  | 414.05 | Coronary atherosclerosis                                             | I25.731 | Atherosclerosis of nonautologous biological coronary artery bypass graft(s) with angina pectoris with documented spasm |
|  | 414.03 | Coronary atherosclerosis of nonautologous biological bypass graft    | I25.738 | Atherosclerosis of nonautologous biological coronary artery bypass graft(s) with other forms of angina pectoris        |
|  | 414.05 | Coronary atherosclerosis                                             | I25.738 | Atherosclerosis of nonautologous biological coronary artery bypass graft(s) with other forms of angina pectoris        |
|  | 414.03 | Coronary atherosclerosis of nonautologous biological bypass graft    | I25.739 | Atherosclerosis of nonautologous biological coronary artery bypass graft(s) with unspecified angina pectoris           |
|  | 414.05 | Coronary atherosclerosis                                             | I25.739 | Atherosclerosis of nonautologous biological coronary artery bypass graft(s) with unspecified angina pectoris           |
|  | 414.00 | Coronary atherosclerosis of unspecified type vessel, native or graft | I25.750 | Atherosclerosis of native coronary artery of transplanted heart with unstable angina                                   |
|  | 414.01 | Coronary atherosclerosis of native coronary artery                   | I25.750 | Atherosclerosis of native coronary artery of transplanted heart with unstable angina                                   |
|  | 414.00 | Coronary atherosclerosis of unspecified type vessel, native or graft | I25.751 | Atherosclerosis of native coronary artery of transplanted heart with angina pectoris with documented spasm             |
|  | 414.01 | Coronary atherosclerosis of native coronary artery                   | I25.751 | Atherosclerosis of native coronary artery of transplanted heart with angina pectoris with documented spasm             |
|  | 414.00 | Coronary atherosclerosis of unspecified type vessel, native or graft | I25.758 | Atherosclerosis of native coronary artery of transplanted heart with other forms of angina pectoris                    |
|  | 414.01 | Coronary atherosclerosis of native coronary artery                   | I25.758 | Atherosclerosis of native coronary artery of transplanted heart with other forms of angina pectoris                    |
|  | 414.00 | Coronary atherosclerosis of unspecified type vessel, native or graft | I25.759 | Atherosclerosis of native coronary artery of transplanted heart with unspecified angina pectoris                       |

|  |        |                                                                      |         |                                                                                                                     |
|--|--------|----------------------------------------------------------------------|---------|---------------------------------------------------------------------------------------------------------------------|
|  | 414.01 | Coronary atherosclerosis of native coronary artery                   | I25.759 | Atherosclerosis of native coronary artery of transplanted heart with unspecified angina pectoris                    |
|  | 414.00 | Coronary atherosclerosis of unspecified type vessel, native or graft | I25.760 | Atherosclerosis of bypass graft of coronary artery of transplanted heart with unstable angina                       |
|  | 414.05 | Coronary atherosclerosis                                             | I25.760 | Atherosclerosis of bypass graft of coronary artery of transplanted heart with unstable angina                       |
|  | 414.00 | Coronary atherosclerosis of unspecified type vessel, native or graft | I25.761 | Atherosclerosis of bypass graft of coronary artery of transplanted heart with angina pectoris with documented spasm |
|  | 414.05 | Coronary atherosclerosis                                             | I25.761 | Atherosclerosis of bypass graft of coronary artery of transplanted heart with angina pectoris with documented spasm |
|  | 414.00 | Coronary atherosclerosis of unspecified type vessel, native or graft | I25.768 | Atherosclerosis of bypass graft of coronary artery of transplanted heart with other forms of angina pectoris        |
|  | 414.05 | Coronary atherosclerosis                                             | I25.768 | Atherosclerosis of bypass graft of coronary artery of transplanted heart with other forms of angina pectoris        |
|  | 414.00 | Coronary atherosclerosis of unspecified type vessel, native or graft | I25.769 | Atherosclerosis of bypass graft of coronary artery of transplanted heart with unspecified angina pectoris           |
|  | 414.05 | Coronary atherosclerosis                                             | I25.769 | Atherosclerosis of bypass graft of coronary artery of transplanted heart with unspecified angina pectoris           |
|  | 414.05 | Coronary atherosclerosis                                             | I25.790 | Atherosclerosis of other coronary artery bypass graft(s) with unstable angina pectoris                              |
|  | 414.05 | Coronary atherosclerosis                                             | I25.791 | Atherosclerosis of other coronary artery bypass graft(s) with angina pectoris with documented spasm                 |
|  | 414.05 | Coronary atherosclerosis                                             | I25.798 | Atherosclerosis of other coronary artery bypass graft(s) with other forms of angina pectoris                        |
|  | 414.05 | Coronary atherosclerosis                                             | I25.799 | Atherosclerosis of other coronary artery bypass graft(s) with unspecified angina pectoris                           |
|  | 414.05 | Coronary atherosclerosis                                             | I25.810 | Atherosclerosis of coronary artery bypass graft(s) without angina pectoris                                          |
|  | 414.00 | Coronary atherosclerosis of unspecified type vessel, native or graft | I25.811 | Atherosclerosis of native coronary artery of transplanted heart without angina pectoris                             |
|  | 414.01 | Coronary atherosclerosis of native coronary artery                   | I25.811 | Atherosclerosis of native coronary artery of transplanted heart without angina pectoris                             |
|  | 414.00 | Coronary atherosclerosis of unspecified type vessel, native or graft | I25.812 | Atherosclerosis of bypass graft of coronary artery of transplanted heart without angina pectoris                    |

|                          |        |                                                                                 |         |                                                                                                                         |
|--------------------------|--------|---------------------------------------------------------------------------------|---------|-------------------------------------------------------------------------------------------------------------------------|
|                          | 414.02 | Coronary atherosclerosis of autologous vein bypass graft                        | I25.812 | Atherosclerosis of bypass graft of coronary artery of transplanted heart without angina pectoris                        |
|                          | 414.05 | Coronary atherosclerosis                                                        | I25.812 | Atherosclerosis of bypass graft of coronary artery of transplanted heart without angina pectoris                        |
| 5. Myocardial infarction | ICD-9  | ICD-9-CM Diagnosis Labeling                                                     | ICD-10  | ICD-10-PCS Diagnosis Labeling                                                                                           |
|                          | 429.5  | Rupture of chordae tendineae                                                    | I23.4   | Rupture of chordae tendineae as current complication following acute myocardial infarction                              |
|                          | 429.6  | Rupture of papillary muscle                                                     | I23.5   | Rupture of papillary muscle as current complication following acute myocardial infarction                               |
|                          | 429.71 | Acquired cardiac septal defect                                                  | I23.1   | Atrial septal defect as current complication following acute myocardial infarction                                      |
|                          | 429.71 | Acquired cardiac septal defect                                                  | I23.2   | Ventricular septal defect as current complication following acute myocardial infarction                                 |
|                          | 429.79 | Other certain sequelae of myocardial infarction, not elsewhere classified       | I23.0   | Hemopericardium as current complication following acute myocardial infarction                                           |
|                          | 429.79 | Other certain sequelae of myocardial infarction, not elsewhere classified       | I23.3   | Rupture of cardiac wall without hemopericardium as current complication following acute myocardial infarction           |
|                          | 429.79 | Other certain sequelae of myocardial infarction, not elsewhere classified       | I23.6   | Thrombosis of atrium, auricular appendage, and ventricle as current complications following acute myocardial infarction |
|                          | 429.79 | Other certain sequelae of myocardial infarction, not elsewhere classified       | I23.8   | Other current complications following acute myocardial infarction                                                       |
|                          | 410.00 | Acute myocardial infarction of anterolateral wall, episode of care unspecified  | I21.09  | ST elevation (STEMI) myocardial infarction involving other coronary artery of anterior wall                             |
|                          | 410.01 | Acute myocardial infarction of anterolateral wall, initial episode of care      | I21.09  | ST elevation (STEMI) myocardial infarction involving other coronary artery of anterior wall                             |
|                          | 410.01 | Acute myocardial infarction of anterolateral wall, initial episode of care      | I22.0   | Subsequent ST elevation (STEMI) myocardial infarction of anterior wall                                                  |
|                          | 410.02 | Acute myocardial infarction of anterolateral wall, subsequent episode of care   | I21.09  | ST elevation (STEMI) myocardial infarction involving other coronary artery of anterior wall                             |
|                          | 410.10 | Acute myocardial infarction of other anterior wall, episode of care unspecified | I21.09  | ST elevation (STEMI) myocardial infarction involving other coronary artery of anterior wall                             |
|                          | 410.11 | Acute myocardial infarction of other anterior wall, initial episode of care     | I21.01  | ST elevation (STEMI) myocardial infarction involving left main coronary artery                                          |
|                          | 410.11 | Acute myocardial infarction of other anterior wall, initial episode of care     | I21.02  | ST elevation (STEMI) myocardial infarction involving left anterior descending coronary artery                           |
|                          | 410.11 | Acute myocardial infarction of other anterior wall, initial episode of care     | I21.09  | ST elevation (STEMI) myocardial infarction involving other coronary artery of anterior wall                             |
|                          | 410.11 | Acute myocardial infarction of other anterior wall, initial episode of care     | I22.0   | Subsequent ST elevation (STEMI) myocardial infarction of anterior wall                                                  |

|        |                                                                                  |        |                                                                                             |
|--------|----------------------------------------------------------------------------------|--------|---------------------------------------------------------------------------------------------|
| 410.12 | Acute myocardial infarction of other anterior wall, subsequent episode of care   | I21.09 | ST elevation (STEMI) myocardial infarction involving other coronary artery of anterior wall |
| 410.20 | Acute myocardial infarction of inferolateral wall, episode of care unspecified   | I21.19 | ST elevation (STEMI) myocardial infarction involving other coronary artery of inferior wall |
| 410.21 | Acute myocardial infarction of inferolateral wall, initial episode of care       | I21.19 | ST elevation (STEMI) myocardial infarction involving other coronary artery of inferior wall |
| 410.21 | Acute myocardial infarction of inferolateral wall, initial episode of care       | I22.1  | Subsequent ST elevation (STEMI) myocardial infarction of inferior wall                      |
| 410.22 | Acute myocardial infarction of inferolateral wall, subsequent episode of care    | I21.19 | ST elevation (STEMI) myocardial infarction involving other coronary artery of inferior wall |
| 410.30 | Acute myocardial infarction of inferoposterior wall, episode of care unspecified | I21.11 | ST elevation (STEMI) myocardial infarction involving right coronary artery                  |
| 410.31 | Acute myocardial infarction of inferoposterior wall, initial episode of care     | I21.11 | ST elevation (STEMI) myocardial infarction involving right coronary artery                  |
| 410.31 | Acute myocardial infarction of inferoposterior wall, initial episode of care     | I22.1  | Subsequent ST elevation (STEMI) myocardial infarction of inferior wall                      |
| 410.32 | Acute myocardial infarction of inferoposterior wall, subsequent episode of care  | I21.11 | ST elevation (STEMI) myocardial infarction involving right coronary artery                  |
| 410.40 | Acute myocardial infarction of other inferior wall, episode of care unspecified  | I21.19 | ST elevation (STEMI) myocardial infarction involving other coronary artery of inferior wall |
| 410.41 | Acute myocardial infarction of other inferior wall, initial episode of care      | I21.19 | ST elevation (STEMI) myocardial infarction involving other coronary artery of inferior wall |
| 410.41 | Acute myocardial infarction of other inferior wall, initial episode of care      | I22.1  | Subsequent ST elevation (STEMI) myocardial infarction of inferior wall                      |
| 410.42 | Acute myocardial infarction of other inferior wall, subsequent episode of care   | I21.19 | ST elevation (STEMI) myocardial infarction involving other coronary artery of inferior wall |
| 410.50 | Acute myocardial infarction of other lateral wall, episode of care unspecified   | I21.29 | ST elevation (STEMI) myocardial infarction involving other sites                            |
| 410.51 | Acute myocardial infarction of other lateral wall, initial episode of care       | I21.29 | ST elevation (STEMI) myocardial infarction involving other sites                            |
| 410.51 | Acute myocardial infarction of other lateral wall, initial episode of care       | I22.8  | Subsequent ST elevation (STEMI) myocardial infarction of other sites                        |
| 410.52 | Acute myocardial infarction of other lateral wall, subsequent episode of care    | I21.29 | ST elevation (STEMI) myocardial infarction involving other sites                            |
| 410.60 | Acute true posterior wall myocardial infarction, episode of care unspecified     | I21.29 | ST elevation (STEMI) myocardial infarction involving other sites                            |
| 410.61 | Acute true posterior wall myocardial infarction, initial episode of care         | I21.29 | ST elevation (STEMI) myocardial infarction involving other sites                            |
| 410.61 | Acute true posterior wall myocardial infarction, initial episode of care         | I22.8  | Subsequent ST elevation (STEMI) myocardial infarction of other sites                        |
| 410.62 | Acute true posterior wall myocardial infarction, subsequent episode of care      | I21.29 | ST elevation (STEMI) myocardial infarction involving other sites                            |



|                              |        |                                                                                   |         |                                                                                      |
|------------------------------|--------|-----------------------------------------------------------------------------------|---------|--------------------------------------------------------------------------------------|
|                              | 410.70 | Acute subendocardial infarction, episode of care unspecified                      | I21.4   | Non-ST elevation (NSTEMI) myocardial infarction                                      |
|                              | 410.71 | Acute subendocardial infarction, initial episode of care                          | I21.4   | Non-ST elevation (NSTEMI) myocardial infarction                                      |
|                              | 410.71 | Acute subendocardial infarction, initial episode of care                          | I22.2   | Subsequent non-ST elevation (NSTEMI) myocardial infarction                           |
|                              | 410.72 | Acute subendocardial infarction, subsequent episode of care                       | I21.4   | Non-ST elevation (NSTEMI) myocardial infarction                                      |
|                              | 410.80 | Acute myocardial infarction of other specified sites, episode of care unspecified | I21.29  | ST elevation (STEMI) myocardial infarction involving other sites                     |
|                              | 410.81 | Acute myocardial infarction of other specified sites, initial episode of care     | I21.21  | ST elevation (STEMI) myocardial infarction involving left circumflex coronary artery |
|                              | 410.81 | Acute myocardial infarction of other specified sites, initial episode of care     | I21.29  | ST elevation (STEMI) myocardial infarction involving other sites                     |
|                              | 410.81 | Acute myocardial infarction of other specified sites, initial episode of care     | I22.8   | Subsequent ST elevation (STEMI) myocardial infarction of other sites                 |
|                              | 410.82 | Acute myocardial infarction of other specified sites, subsequent episode of care  | I21.29  | ST elevation (STEMI) myocardial infarction involving other sites                     |
|                              | 410.90 | Acute myocardial infarction of unspecified site, episode of care unspecified      | I21.3   | ST elevation (STEMI) myocardial infarction of unspecified site                       |
|                              | 410.91 | Acute myocardial infarction of unspecified site, initial episode of care          | I21.3   | ST elevation (STEMI) myocardial infarction of unspecified site                       |
|                              | 410.91 | Acute myocardial infarction of unspecified site, initial episode of care          | I22.9   | Subsequent ST elevation (STEMI) myocardial infarction of unspecified site            |
|                              | 410.92 | Acute myocardial infarction of unspecified site, subsequent episode of care       | I21.3   | ST elevation (STEMI) myocardial infarction of unspecified site                       |
|                              | 411.81 | Coronary occlusion without myocardial infarction                                  | I24.0   | Acute coronary thrombosis not resulting in myocardial infarction                     |
|                              | 412    | Old myocardial infarction                                                         | I25.2   | Old myocardial infarction                                                            |
| 6. Peripheral artery disease | ICD-9  | ICD-9-CM Diagnosis Labeling                                                       | ICD-10  | ICD-10-PCS Diagnosis Labeling                                                        |
|                              | 440.8  | Atherosclerosis of other specified arteries                                       | I70.8   | Atherosclerosis of other arteries                                                    |
|                              | 443.89 | Other specified peripheral vascular diseases                                      | I73.89  | Other specified peripheral vascular diseases                                         |
|                              | 443.9  | Peripheral vascular disease, unspecified                                          | I73.9   | Peripheral vascular disease, unspecified                                             |
|                              | 440.20 | Atherosclerosis of the extremities, unspecified                                   | I70.201 | Unspecified atherosclerosis of native arteries of extremities, right leg             |
|                              | 440.20 | Atherosclerosis of the extremities, unspecified                                   | I70.202 | Unspecified atherosclerosis of native arteries of extremities, left leg              |
|                              | 440.20 | Atherosclerosis of the extremities, unspecified                                   | I70.203 | Unspecified atherosclerosis of native arteries of extremities, bilateral legs        |
|                              | 440.20 | Atherosclerosis of the extremities, unspecified                                   | I70.208 | Unspecified atherosclerosis of native arteries of extremities, other extremity       |

|  |        |                                                                   |         |                                                                                                         |
|--|--------|-------------------------------------------------------------------|---------|---------------------------------------------------------------------------------------------------------|
|  | 440.20 | Atherosclerosis of the extremities, unspecified                   | I70.209 | Unspecified atherosclerosis of native arteries of extremities, unspecified extremity                    |
|  | 440.21 | Atherosclerosis of the extremities with intermittent claudication | I70.211 | Atherosclerosis of native arteries of extremities with intermittent claudication, right leg             |
|  | 440.21 | Atherosclerosis of the extremities with intermittent claudication | I70.212 | Atherosclerosis of native arteries of extremities with intermittent claudication, left leg              |
|  | 440.21 | Atherosclerosis of the extremities with intermittent claudication | I70.213 | Atherosclerosis of native arteries of extremities with intermittent claudication, bilateral legs        |
|  | 440.21 | Atherosclerosis of the extremities with intermittent claudication | I70.218 | Atherosclerosis of native arteries of extremities with intermittent claudication, other extremity       |
|  | 440.21 | Atherosclerosis of the extremities with intermittent claudication | I70.219 | Atherosclerosis of native arteries of extremities with intermittent claudication, unspecified extremity |
|  | 440.22 | Atherosclerosis of the extremities with rest pain                 | I70.221 | Atherosclerosis of native arteries of extremities with rest pain, right leg                             |
|  | 440.22 | Atherosclerosis of the extremities with rest pain                 | I70.222 | Atherosclerosis of native arteries of extremities with rest pain, left leg                              |
|  | 440.22 | Atherosclerosis of the extremities with rest pain                 | I70.223 | Atherosclerosis of native arteries of extremities with rest pain, bilateral legs                        |
|  | 440.22 | Atherosclerosis of the extremities with rest pain                 | I70.228 | Atherosclerosis of native arteries of extremities with rest pain, other extremity                       |
|  | 440.22 | Atherosclerosis of the extremities with rest pain                 | I70.229 | Atherosclerosis of native arteries of extremities with rest pain, unspecified extremity                 |
|  | 440.23 | Atherosclerosis of the extremities with ulceration                | I70.231 | Atherosclerosis of native arteries of right leg with ulceration of thigh                                |
|  | 440.23 | Atherosclerosis of the extremities with ulceration                | I70.232 | Atherosclerosis of native arteries of right leg with ulceration of calf                                 |
|  | 440.23 | Atherosclerosis of the extremities with ulceration                | I70.233 | Atherosclerosis of native arteries of right leg with ulceration of ankle                                |
|  | 440.23 | Atherosclerosis of the extremities with ulceration                | I70.234 | Atherosclerosis of native arteries of right leg with ulceration of heel and midfoot                     |
|  | 440.23 | Atherosclerosis of the extremities with ulceration                | I70.235 | Atherosclerosis of native arteries of right leg with ulceration of other part of foot                   |
|  | 440.23 | Atherosclerosis of the extremities with ulceration                | I70.238 | Atherosclerosis of native arteries of right leg with ulceration of other part of lower right leg        |
|  | 440.23 | Atherosclerosis of the extremities with ulceration                | I70.239 | Atherosclerosis of native arteries of right leg with ulceration of unspecified site                     |
|  | 440.23 | Atherosclerosis of the extremities with ulceration                | I70.241 | Atherosclerosis of native arteries of left leg with ulceration of thigh                                 |
|  | 440.23 | Atherosclerosis of the extremities with ulceration                | I70.242 | Atherosclerosis of native arteries of left leg with ulceration of calf                                  |

|  |        |                                                                |         |                                                                                                        |
|--|--------|----------------------------------------------------------------|---------|--------------------------------------------------------------------------------------------------------|
|  | 440.23 | Atherosclerosis of the extremities with ulceration             | I70.243 | Atherosclerosis of native arteries of left leg with ulceration of ankle                                |
|  | 440.23 | Atherosclerosis of the extremities with ulceration             | I70.244 | Atherosclerosis of native arteries of left leg with ulceration of heel and midfoot                     |
|  | 440.23 | Atherosclerosis of the extremities with ulceration             | I70.245 | Atherosclerosis of native arteries of left leg with ulceration of other part of foot                   |
|  | 440.23 | Atherosclerosis of the extremities with ulceration             | I70.248 | Atherosclerosis of native arteries of left leg with ulceration of other part of lower left leg         |
|  | 440.23 | Atherosclerosis of the extremities with ulceration             | I70.249 | Atherosclerosis of native arteries of left leg with ulceration of unspecified site                     |
|  | 440.23 | Atherosclerosis of the extremities with ulceration             | I70.25  | Atherosclerosis of native arteries of other extremities with ulceration                                |
|  | 440.24 | Atherosclerosis of the extremities with gangrene               | I70.261 | Atherosclerosis of native arteries of extremities with gangrene, right leg                             |
|  | 440.24 | Atherosclerosis of the extremities with gangrene               | I70.262 | Atherosclerosis of native arteries of extremities with gangrene, left leg                              |
|  | 440.24 | Atherosclerosis of the extremities with gangrene               | I70.263 | Atherosclerosis of native arteries of extremities with gangrene, bilateral legs                        |
|  | 440.24 | Atherosclerosis of the extremities with gangrene               | I70.268 | Atherosclerosis of native arteries of extremities with gangrene, other extremity                       |
|  | 440.24 | Atherosclerosis of the extremities with gangrene               | I70.269 | Atherosclerosis of native arteries of extremities with gangrene, unspecified extremity                 |
|  | 440.29 | Other atherosclerosis of native arteries of the extremities    | I70.291 | Other atherosclerosis of native arteries of extremities, right leg                                     |
|  | 440.29 | Other atherosclerosis of native arteries of the extremities    | I70.292 | Other atherosclerosis of native arteries of extremities, left leg                                      |
|  | 440.29 | Other atherosclerosis of native arteries of the extremities    | I70.293 | Other atherosclerosis of native arteries of extremities, bilateral legs                                |
|  | 440.29 | Other atherosclerosis of native arteries of the extremities    | I70.298 | Other atherosclerosis of native arteries of extremities, other extremity                               |
|  | 440.29 | Other atherosclerosis of native arteries of the extremities    | I70.299 | Other atherosclerosis of native arteries of extremities, unspecified extremity                         |
|  | 440.30 | Atherosclerosis of unspecified bypass graft of the extremities | I70.301 | Unspecified atherosclerosis of unspecified type of bypass graft(s) of the extremities, right leg       |
|  | 440.30 | Atherosclerosis of unspecified bypass graft of the extremities | I70.302 | Unspecified atherosclerosis of unspecified type of bypass graft(s) of the extremities, left leg        |
|  | 440.30 | Atherosclerosis of unspecified bypass graft of the extremities | I70.303 | Unspecified atherosclerosis of unspecified type of bypass graft(s) of the extremities, bilateral legs  |
|  | 440.30 | Atherosclerosis of unspecified bypass graft of the extremities | I70.308 | Unspecified atherosclerosis of unspecified type of bypass graft(s) of the extremities, other extremity |

|  |        |                                                                |         |                                                                                                                                 |
|--|--------|----------------------------------------------------------------|---------|---------------------------------------------------------------------------------------------------------------------------------|
|  | 440.30 | Atherosclerosis of unspecified bypass graft of the extremities | I70.309 | Unspecified atherosclerosis of unspecified type of bypass graft(s) of the extremities, unspecified extremity                    |
|  | 440.30 | Atherosclerosis of unspecified bypass graft of the extremities | I70.311 | Atherosclerosis of unspecified type of bypass graft(s) of the extremities with intermittent claudication, right leg             |
|  | 440.30 | Atherosclerosis of unspecified bypass graft of the extremities | I70.312 | Atherosclerosis of unspecified type of bypass graft(s) of the extremities with intermittent claudication, left leg              |
|  | 440.30 | Atherosclerosis of unspecified bypass graft of the extremities | I70.313 | Atherosclerosis of unspecified type of bypass graft(s) of the extremities with intermittent claudication, bilateral legs        |
|  | 440.30 | Atherosclerosis of unspecified bypass graft of the extremities | I70.318 | Atherosclerosis of unspecified type of bypass graft(s) of the extremities with intermittent claudication, other extremity       |
|  | 440.30 | Atherosclerosis of unspecified bypass graft of the extremities | I70.319 | Atherosclerosis of unspecified type of bypass graft(s) of the extremities with intermittent claudication, unspecified extremity |
|  | 440.30 | Atherosclerosis of unspecified bypass graft of the extremities | I70.321 | Atherosclerosis of unspecified type of bypass graft(s) of the extremities with rest pain, right leg                             |
|  | 440.30 | Atherosclerosis of unspecified bypass graft of the extremities | I70.322 | Atherosclerosis of unspecified type of bypass graft(s) of the extremities with rest pain, left leg                              |
|  | 440.30 | Atherosclerosis of unspecified bypass graft of the extremities | I70.323 | Atherosclerosis of unspecified type of bypass graft(s) of the extremities with rest pain, bilateral legs                        |
|  | 440.30 | Atherosclerosis of unspecified bypass graft of the extremities | I70.328 | Atherosclerosis of unspecified type of bypass graft(s) of the extremities with rest pain, other extremity                       |
|  | 440.30 | Atherosclerosis of unspecified bypass graft of the extremities | I70.329 | Atherosclerosis of unspecified type of bypass graft(s) of the extremities with rest pain, unspecified extremity                 |
|  | 440.30 | Atherosclerosis of unspecified bypass graft of the extremities | I70.331 | Atherosclerosis of unspecified type of bypass graft(s) of the right leg with ulceration of thigh                                |
|  | 440.30 | Atherosclerosis of unspecified bypass graft of the extremities | I70.332 | Atherosclerosis of unspecified type of bypass graft(s) of the right leg with ulceration of calf                                 |
|  | 440.30 | Atherosclerosis of unspecified bypass graft of the extremities | I70.333 | Atherosclerosis of unspecified type of bypass graft(s) of the right leg with ulceration of ankle                                |
|  | 440.30 | Atherosclerosis of unspecified bypass graft of the extremities | I70.334 | Atherosclerosis of unspecified type of bypass graft(s) of the right leg with ulceration of heel and midfoot                     |

|  |        |                                                                |         |                                                                                                                    |
|--|--------|----------------------------------------------------------------|---------|--------------------------------------------------------------------------------------------------------------------|
|  | 440.30 | Atherosclerosis of unspecified bypass graft of the extremities | 170.335 | Atherosclerosis of unspecified type of bypass graft(s) of the right leg with ulceration of other part of foot      |
|  | 440.30 | Atherosclerosis of unspecified bypass graft of the extremities | 170.338 | Atherosclerosis of unspecified type of bypass graft(s) of the right leg with ulceration of other part of lower leg |
|  | 440.30 | Atherosclerosis of unspecified bypass graft of the extremities | 170.339 | Atherosclerosis of unspecified type of bypass graft(s) of the right leg with ulceration of unspecified site        |
|  | 440.30 | Atherosclerosis of unspecified bypass graft of the extremities | 170.341 | Atherosclerosis of unspecified type of bypass graft(s) of the left leg with ulceration of thigh                    |
|  | 440.30 | Atherosclerosis of unspecified bypass graft of the extremities | 170.342 | Atherosclerosis of unspecified type of bypass graft(s) of the left leg with ulceration of calf                     |
|  | 440.30 | Atherosclerosis of unspecified bypass graft of the extremities | 170.343 | Atherosclerosis of unspecified type of bypass graft(s) of the left leg with ulceration of ankle                    |
|  | 440.30 | Atherosclerosis of unspecified bypass graft of the extremities | 170.344 | Atherosclerosis of unspecified type of bypass graft(s) of the left leg with ulceration of heel and midfoot         |
|  | 440.30 | Atherosclerosis of unspecified bypass graft of the extremities | 170.345 | Atherosclerosis of unspecified type of bypass graft(s) of the left leg with ulceration of other part of foot       |
|  | 440.30 | Atherosclerosis of unspecified bypass graft of the extremities | 170.348 | Atherosclerosis of unspecified type of bypass graft(s) of the left leg with ulceration of other part of lower leg  |
|  | 440.30 | Atherosclerosis of unspecified bypass graft of the extremities | 170.349 | Atherosclerosis of unspecified type of bypass graft(s) of the left leg with ulceration of unspecified site         |
|  | 440.30 | Atherosclerosis of unspecified bypass graft of the extremities | 170.35  | Atherosclerosis of unspecified type of bypass graft(s) of other extremity with ulceration                          |
|  | 440.30 | Atherosclerosis of unspecified bypass graft of the extremities | 170.361 | Atherosclerosis of unspecified type of bypass graft(s) of the extremities with gangrene, right leg                 |
|  | 440.30 | Atherosclerosis of unspecified bypass graft of the extremities | 170.362 | Atherosclerosis of unspecified type of bypass graft(s) of the extremities with gangrene, left leg                  |
|  | 440.30 | Atherosclerosis of unspecified bypass graft of the extremities | 170.363 | Atherosclerosis of unspecified type of bypass graft(s) of the extremities with gangrene, bilateral legs            |
|  | 440.30 | Atherosclerosis of unspecified bypass graft of the extremities | 170.368 | Atherosclerosis of unspecified type of bypass graft(s) of the extremities with gangrene, other extremity           |
|  | 440.30 | Atherosclerosis of unspecified bypass graft of the extremities | 170.369 | Atherosclerosis of unspecified type of bypass graft(s) of the extremities with gangrene, unspecified extremity     |

|        |                                                                |         |                                                                                                                           |
|--------|----------------------------------------------------------------|---------|---------------------------------------------------------------------------------------------------------------------------|
| 440.30 | Atherosclerosis of unspecified bypass graft of the extremities | I70.391 | Other atherosclerosis of unspecified type of bypass graft(s) of the extremities, right leg                                |
| 440.30 | Atherosclerosis of unspecified bypass graft of the extremities | I70.392 | Other atherosclerosis of unspecified type of bypass graft(s) of the extremities, left leg                                 |
| 440.30 | Atherosclerosis of unspecified bypass graft of the extremities | I70.393 | Other atherosclerosis of unspecified type of bypass graft(s) of the extremities, bilateral legs                           |
| 440.30 | Atherosclerosis of unspecified bypass graft of the extremities | I70.398 | Other atherosclerosis of unspecified type of bypass graft(s) of the extremities, other extremity                          |
| 440.30 | Atherosclerosis of unspecified bypass graft of the extremities | I70.399 | Other atherosclerosis of unspecified type of bypass graft(s) of the extremities, unspecified extremity                    |
| 440.30 | Atherosclerosis of unspecified bypass graft of the extremities | I70.601 | Unspecified atherosclerosis of nonbiological bypass graft(s) of the extremities, right leg                                |
| 440.30 | Atherosclerosis of unspecified bypass graft of the extremities | I70.602 | Unspecified atherosclerosis of nonbiological bypass graft(s) of the extremities, left leg                                 |
| 440.30 | Atherosclerosis of unspecified bypass graft of the extremities | I70.603 | Unspecified atherosclerosis of nonbiological bypass graft(s) of the extremities, bilateral legs                           |
| 440.30 | Atherosclerosis of unspecified bypass graft of the extremities | I70.608 | Unspecified atherosclerosis of nonbiological bypass graft(s) of the extremities, other extremity                          |
| 440.30 | Atherosclerosis of unspecified bypass graft of the extremities | I70.609 | Unspecified atherosclerosis of nonbiological bypass graft(s) of the extremities, unspecified extremity                    |
| 440.30 | Atherosclerosis of unspecified bypass graft of the extremities | I70.611 | Atherosclerosis of nonbiological bypass graft(s) of the extremities with intermittent claudication, right leg             |
| 440.30 | Atherosclerosis of unspecified bypass graft of the extremities | I70.612 | Atherosclerosis of nonbiological bypass graft(s) of the extremities with intermittent claudication, left leg              |
| 440.30 | Atherosclerosis of unspecified bypass graft of the extremities | I70.613 | Atherosclerosis of nonbiological bypass graft(s) of the extremities with intermittent claudication, bilateral legs        |
| 440.30 | Atherosclerosis of unspecified bypass graft of the extremities | I70.618 | Atherosclerosis of nonbiological bypass graft(s) of the extremities with intermittent claudication, other extremity       |
| 440.30 | Atherosclerosis of unspecified bypass graft of the extremities | I70.619 | Atherosclerosis of nonbiological bypass graft(s) of the extremities with intermittent claudication, unspecified extremity |
| 440.30 | Atherosclerosis of unspecified bypass graft of the extremities | I70.621 | Atherosclerosis of nonbiological bypass graft(s) of the extremities with rest pain, right leg                             |
| 440.30 | Atherosclerosis of unspecified bypass graft of the extremities | I70.622 | Atherosclerosis of nonbiological bypass graft(s) of the extremities with rest pain, left leg                              |
| 440.30 | Atherosclerosis of unspecified bypass graft of the extremities | I70.623 | Atherosclerosis of nonbiological bypass graft(s) of the extremities with rest pain, bilateral legs                        |

|        |                                                                |         |                                                                                                              |
|--------|----------------------------------------------------------------|---------|--------------------------------------------------------------------------------------------------------------|
| 440.30 | Atherosclerosis of unspecified bypass graft of the extremities | I70.628 | Atherosclerosis of nonbiological bypass graft(s) of the extremities with rest pain, other extremity          |
| 440.30 | Atherosclerosis of unspecified bypass graft of the extremities | I70.629 | Atherosclerosis of nonbiological bypass graft(s) of the extremities with rest pain, unspecified extremity    |
| 440.30 | Atherosclerosis of unspecified bypass graft of the extremities | I70.631 | Atherosclerosis of nonbiological bypass graft(s) of the right leg with ulceration of thigh                   |
| 440.30 | Atherosclerosis of unspecified bypass graft of the extremities | I70.632 | Atherosclerosis of nonbiological bypass graft(s) of the right leg with ulceration of calf                    |
| 440.30 | Atherosclerosis of unspecified bypass graft of the extremities | I70.633 | Atherosclerosis of nonbiological bypass graft(s) of the right leg with ulceration of ankle                   |
| 440.30 | Atherosclerosis of unspecified bypass graft of the extremities | I70.634 | Atherosclerosis of nonbiological bypass graft(s) of the right leg with ulceration of heel and midfoot        |
| 440.30 | Atherosclerosis of unspecified bypass graft of the extremities | I70.635 | Atherosclerosis of nonbiological bypass graft(s) of the right leg with ulceration of other part of foot      |
| 440.30 | Atherosclerosis of unspecified bypass graft of the extremities | I70.638 | Atherosclerosis of nonbiological bypass graft(s) of the right leg with ulceration of other part of lower leg |
| 440.30 | Atherosclerosis of unspecified bypass graft of the extremities | I70.639 | Atherosclerosis of nonbiological bypass graft(s) of the right leg with ulceration of unspecified site        |
| 440.30 | Atherosclerosis of unspecified bypass graft of the extremities | I70.641 | Atherosclerosis of nonbiological bypass graft(s) of the left leg with ulceration of thigh                    |
| 440.30 | Atherosclerosis of unspecified bypass graft of the extremities | I70.642 | Atherosclerosis of nonbiological bypass graft(s) of the left leg with ulceration of calf                     |
| 440.30 | Atherosclerosis of unspecified bypass graft of the extremities | I70.643 | Atherosclerosis of nonbiological bypass graft(s) of the left leg with ulceration of ankle                    |
| 440.30 | Atherosclerosis of unspecified bypass graft of the extremities | I70.644 | Atherosclerosis of nonbiological bypass graft(s) of the left leg with ulceration of heel and midfoot         |
| 440.30 | Atherosclerosis of unspecified bypass graft of the extremities | I70.645 | Atherosclerosis of nonbiological bypass graft(s) of the left leg with ulceration of other part of foot       |
| 440.30 | Atherosclerosis of unspecified bypass graft of the extremities | I70.648 | Atherosclerosis of nonbiological bypass graft(s) of the left leg with ulceration of other part of lower leg  |
| 440.30 | Atherosclerosis of unspecified bypass graft of the extremities | I70.649 | Atherosclerosis of nonbiological bypass graft(s) of the left leg with ulceration of unspecified site         |
| 440.30 | Atherosclerosis of unspecified bypass graft of the extremities | I70.65  | Atherosclerosis of nonbiological bypass graft(s) of other extremity with ulceration                          |
| 440.30 | Atherosclerosis of unspecified bypass graft of the extremities | I70.661 | Atherosclerosis of nonbiological bypass graft(s) of the extremities with gangrene, right leg                 |
| 440.30 | Atherosclerosis of unspecified bypass graft of the extremities | I70.662 | Atherosclerosis of nonbiological bypass graft(s) of the extremities with gangrene, left leg                  |

|        |                                                                |         |                                                                                                                           |
|--------|----------------------------------------------------------------|---------|---------------------------------------------------------------------------------------------------------------------------|
| 440.30 | Atherosclerosis of unspecified bypass graft of the extremities | I70.663 | Atherosclerosis of nonbiological bypass graft(s) of the extremities with gangrene, bilateral legs                         |
| 440.30 | Atherosclerosis of unspecified bypass graft of the extremities | I70.668 | Atherosclerosis of nonbiological bypass graft(s) of the extremities with gangrene, other extremity                        |
| 440.30 | Atherosclerosis of unspecified bypass graft of the extremities | I70.669 | Atherosclerosis of nonbiological bypass graft(s) of the extremities with gangrene, unspecified extremity                  |
| 440.30 | Atherosclerosis of unspecified bypass graft of the extremities | I70.691 | Other atherosclerosis of nonbiological bypass graft(s) of the extremities, right leg                                      |
| 440.30 | Atherosclerosis of unspecified bypass graft of the extremities | I70.692 | Other atherosclerosis of nonbiological bypass graft(s) of the extremities, left leg                                       |
| 440.30 | Atherosclerosis of unspecified bypass graft of the extremities | I70.693 | Other atherosclerosis of nonbiological bypass graft(s) of the extremities, bilateral legs                                 |
| 440.30 | Atherosclerosis of unspecified bypass graft of the extremities | I70.698 | Other atherosclerosis of nonbiological bypass graft(s) of the extremities, other extremity                                |
| 440.30 | Atherosclerosis of unspecified bypass graft of the extremities | I70.699 | Other atherosclerosis of nonbiological bypass graft(s) of the extremities, unspecified extremity                          |
| 440.30 | Atherosclerosis of unspecified bypass graft of the extremities | I70.701 | Unspecified atherosclerosis of other type of bypass graft(s) of the extremities, right leg                                |
| 440.30 | Atherosclerosis of unspecified bypass graft of the extremities | I70.702 | Unspecified atherosclerosis of other type of bypass graft(s) of the extremities, left leg                                 |
| 440.30 | Atherosclerosis of unspecified bypass graft of the extremities | I70.703 | Unspecified atherosclerosis of other type of bypass graft(s) of the extremities, bilateral legs                           |
| 440.30 | Atherosclerosis of unspecified bypass graft of the extremities | I70.708 | Unspecified atherosclerosis of other type of bypass graft(s) of the extremities, other extremity                          |
| 440.30 | Atherosclerosis of unspecified bypass graft of the extremities | I70.709 | Unspecified atherosclerosis of other type of bypass graft(s) of the extremities, unspecified extremity                    |
| 440.30 | Atherosclerosis of unspecified bypass graft of the extremities | I70.711 | Atherosclerosis of other type of bypass graft(s) of the extremities with intermittent claudication, right leg             |
| 440.30 | Atherosclerosis of unspecified bypass graft of the extremities | I70.712 | Atherosclerosis of other type of bypass graft(s) of the extremities with intermittent claudication, left leg              |
| 440.30 | Atherosclerosis of unspecified bypass graft of the extremities | I70.713 | Atherosclerosis of other type of bypass graft(s) of the extremities with intermittent claudication, bilateral legs        |
| 440.30 | Atherosclerosis of unspecified bypass graft of the extremities | I70.718 | Atherosclerosis of other type of bypass graft(s) of the extremities with intermittent claudication, other extremity       |
| 440.30 | Atherosclerosis of unspecified bypass graft of the extremities | I70.719 | Atherosclerosis of other type of bypass graft(s) of the extremities with intermittent claudication, unspecified extremity |



|        |                                                                |         |                                                                                                              |
|--------|----------------------------------------------------------------|---------|--------------------------------------------------------------------------------------------------------------|
| 440.30 | Atherosclerosis of unspecified bypass graft of the extremities | I70.721 | Atherosclerosis of other type of bypass graft(s) of the extremities with rest pain, right leg                |
| 440.30 | Atherosclerosis of unspecified bypass graft of the extremities | I70.722 | Atherosclerosis of other type of bypass graft(s) of the extremities with rest pain, left leg                 |
| 440.30 | Atherosclerosis of unspecified bypass graft of the extremities | I70.723 | Atherosclerosis of other type of bypass graft(s) of the extremities with rest pain, bilateral legs           |
| 440.30 | Atherosclerosis of unspecified bypass graft of the extremities | I70.728 | Atherosclerosis of other type of bypass graft(s) of the extremities with rest pain, other extremity          |
| 440.30 | Atherosclerosis of unspecified bypass graft of the extremities | I70.729 | Atherosclerosis of other type of bypass graft(s) of the extremities with rest pain, unspecified extremity    |
| 440.30 | Atherosclerosis of unspecified bypass graft of the extremities | I70.731 | Atherosclerosis of other type of bypass graft(s) of the right leg with ulceration of thigh                   |
| 440.30 | Atherosclerosis of unspecified bypass graft of the extremities | I70.732 | Atherosclerosis of other type of bypass graft(s) of the right leg with ulceration of calf                    |
| 440.30 | Atherosclerosis of unspecified bypass graft of the extremities | I70.733 | Atherosclerosis of other type of bypass graft(s) of the right leg with ulceration of ankle                   |
| 440.30 | Atherosclerosis of unspecified bypass graft of the extremities | I70.734 | Atherosclerosis of other type of bypass graft(s) of the right leg with ulceration of heel and midfoot        |
| 440.30 | Atherosclerosis of unspecified bypass graft of the extremities | I70.735 | Atherosclerosis of other type of bypass graft(s) of the right leg with ulceration of other part of foot      |
| 440.30 | Atherosclerosis of unspecified bypass graft of the extremities | I70.738 | Atherosclerosis of other type of bypass graft(s) of the right leg with ulceration of other part of lower leg |
| 440.30 | Atherosclerosis of unspecified bypass graft of the extremities | I70.739 | Atherosclerosis of other type of bypass graft(s) of the right leg with ulceration of unspecified site        |
| 440.30 | Atherosclerosis of unspecified bypass graft of the extremities | I70.741 | Atherosclerosis of other type of bypass graft(s) of the left leg with ulceration of thigh                    |
| 440.30 | Atherosclerosis of unspecified bypass graft of the extremities | I70.742 | Atherosclerosis of other type of bypass graft(s) of the left leg with ulceration of calf                     |
| 440.30 | Atherosclerosis of unspecified bypass graft of the extremities | I70.743 | Atherosclerosis of other type of bypass graft(s) of the left leg with ulceration of ankle                    |
| 440.30 | Atherosclerosis of unspecified bypass graft of the extremities | I70.744 | Atherosclerosis of other type of bypass graft(s) of the left leg with ulceration of heel and midfoot         |
| 440.30 | Atherosclerosis of unspecified bypass graft of the extremities | I70.745 | Atherosclerosis of other type of bypass graft(s) of the left leg with ulceration of other part of foot       |
| 440.30 | Atherosclerosis of unspecified bypass graft of the extremities | I70.748 | Atherosclerosis of other type of bypass graft(s) of the left leg with ulceration of other part of lower leg  |
| 440.30 | Atherosclerosis of unspecified bypass graft of the extremities | I70.749 | Atherosclerosis of other type of bypass graft(s) of the left leg with ulceration of unspecified site         |

|  |        |                                                                    |         |                                                                                                                 |
|--|--------|--------------------------------------------------------------------|---------|-----------------------------------------------------------------------------------------------------------------|
|  | 440.30 | Atherosclerosis of unspecified bypass graft of the extremities     | I70.75  | Atherosclerosis of other type of bypass graft(s) of other extremity with ulceration                             |
|  | 440.30 | Atherosclerosis of unspecified bypass graft of the extremities     | I70.761 | Atherosclerosis of other type of bypass graft(s) of the extremities with gangrene, right leg                    |
|  | 440.30 | Atherosclerosis of unspecified bypass graft of the extremities     | I70.762 | Atherosclerosis of other type of bypass graft(s) of the extremities with gangrene, left leg                     |
|  | 440.30 | Atherosclerosis of unspecified bypass graft of the extremities     | I70.763 | Atherosclerosis of other type of bypass graft(s) of the extremities with gangrene, bilateral legs               |
|  | 440.30 | Atherosclerosis of unspecified bypass graft of the extremities     | I70.768 | Atherosclerosis of other type of bypass graft(s) of the extremities with gangrene, other extremity              |
|  | 440.30 | Atherosclerosis of unspecified bypass graft of the extremities     | I70.769 | Atherosclerosis of other type of bypass graft(s) of the extremities with gangrene, unspecified extremity        |
|  | 440.30 | Atherosclerosis of unspecified bypass graft of the extremities     | I70.791 | Other atherosclerosis of other type of bypass graft(s) of the extremities, right leg                            |
|  | 440.30 | Atherosclerosis of unspecified bypass graft of the extremities     | I70.792 | Other atherosclerosis of other type of bypass graft(s) of the extremities, left leg                             |
|  | 440.30 | Atherosclerosis of unspecified bypass graft of the extremities     | I70.793 | Other atherosclerosis of other type of bypass graft(s) of the extremities, bilateral legs                       |
|  | 440.30 | Atherosclerosis of unspecified bypass graft of the extremities     | I70.798 | Other atherosclerosis of other type of bypass graft(s) of the extremities, other extremity                      |
|  | 440.30 | Atherosclerosis of unspecified bypass graft of the extremities     | I70.799 | Other atherosclerosis of other type of bypass graft(s) of the extremities, unspecified extremity                |
|  | 440.31 | Atherosclerosis of autologous vein bypass graft of the extremities | I70.401 | Unspecified atherosclerosis of autologous vein bypass graft(s) of the extremities, right leg                    |
|  | 440.31 | Atherosclerosis of autologous vein bypass graft of the extremities | I70.402 | Unspecified atherosclerosis of autologous vein bypass graft(s) of the extremities, left leg                     |
|  | 440.31 | Atherosclerosis of autologous vein bypass graft of the extremities | I70.403 | Unspecified atherosclerosis of autologous vein bypass graft(s) of the extremities, bilateral legs               |
|  | 440.31 | Atherosclerosis of autologous vein bypass graft of the extremities | I70.408 | Unspecified atherosclerosis of autologous vein bypass graft(s) of the extremities, other extremity              |
|  | 440.31 | Atherosclerosis of autologous vein bypass graft of the extremities | I70.409 | Unspecified atherosclerosis of autologous vein bypass graft(s) of the extremities, unspecified extremity        |
|  | 440.31 | Atherosclerosis of autologous vein bypass graft of the extremities | I70.411 | Atherosclerosis of autologous vein bypass graft(s) of the extremities with intermittent claudication, right leg |
|  | 440.31 | Atherosclerosis of autologous vein bypass graft of the extremities | I70.412 | Atherosclerosis of autologous vein bypass graft(s) of the extremities with intermittent claudication, left leg  |

|        |                                                                    |         |                                                                                                                             |
|--------|--------------------------------------------------------------------|---------|-----------------------------------------------------------------------------------------------------------------------------|
| 440.31 | Atherosclerosis of autologous vein bypass graft of the extremities | I70.413 | Atherosclerosis of autologous vein bypass graft(s) of the extremities with intermittent claudication, bilateral legs        |
| 440.31 | Atherosclerosis of autologous vein bypass graft of the extremities | I70.418 | Atherosclerosis of autologous vein bypass graft(s) of the extremities with intermittent claudication, other extremity       |
| 440.31 | Atherosclerosis of autologous vein bypass graft of the extremities | I70.419 | Atherosclerosis of autologous vein bypass graft(s) of the extremities with intermittent claudication, unspecified extremity |
| 440.31 | Atherosclerosis of autologous vein bypass graft of the extremities | I70.421 | Atherosclerosis of autologous vein bypass graft(s) of the extremities with rest pain, right leg                             |
| 440.31 | Atherosclerosis of autologous vein bypass graft of the extremities | I70.422 | Atherosclerosis of autologous vein bypass graft(s) of the extremities with rest pain, left leg                              |
| 440.31 | Atherosclerosis of autologous vein bypass graft of the extremities | I70.423 | Atherosclerosis of autologous vein bypass graft(s) of the extremities with rest pain, bilateral legs                        |
| 440.31 | Atherosclerosis of autologous vein bypass graft of the extremities | I70.428 | Atherosclerosis of autologous vein bypass graft(s) of the extremities with rest pain, other extremity                       |
| 440.31 | Atherosclerosis of autologous vein bypass graft of the extremities | I70.429 | Atherosclerosis of autologous vein bypass graft(s) of the extremities with rest pain, unspecified extremity                 |
| 440.31 | Atherosclerosis of autologous vein bypass graft of the extremities | I70.431 | Atherosclerosis of autologous vein bypass graft(s) of the right leg with ulceration of thigh                                |
| 440.31 | Atherosclerosis of autologous vein bypass graft of the extremities | I70.432 | Atherosclerosis of autologous vein bypass graft(s) of the right leg with ulceration of calf                                 |
| 440.31 | Atherosclerosis of autologous vein bypass graft of the extremities | I70.433 | Atherosclerosis of autologous vein bypass graft(s) of the right leg with ulceration of ankle                                |
| 440.31 | Atherosclerosis of autologous vein bypass graft of the extremities | I70.434 | Atherosclerosis of autologous vein bypass graft(s) of the right leg with ulceration of heel and midfoot                     |
| 440.31 | Atherosclerosis of autologous vein bypass graft of the extremities | I70.435 | Atherosclerosis of autologous vein bypass graft(s) of the right leg with ulceration of other part of foot                   |
| 440.31 | Atherosclerosis of autologous vein bypass graft of the extremities | I70.438 | Atherosclerosis of autologous vein bypass graft(s) of the right leg with ulceration of other part of lower leg              |
| 440.31 | Atherosclerosis of autologous vein bypass graft of the extremities | I70.439 | Atherosclerosis of autologous vein bypass graft(s) of the right leg with ulceration of unspecified site                     |
| 440.31 | Atherosclerosis of autologous vein bypass graft of the extremities | I70.441 | Atherosclerosis of autologous vein bypass graft(s) of the left leg with ulceration of thigh                                 |
| 440.31 | Atherosclerosis of autologous vein bypass graft of the extremities | I70.442 | Atherosclerosis of autologous vein bypass graft(s) of the left leg with ulceration of calf                                  |
| 440.31 | Atherosclerosis of autologous vein bypass graft of the extremities | I70.443 | Atherosclerosis of autologous vein bypass graft(s) of the left leg with ulceration of ankle                                 |

|  |        |                                                                             |         |                                                                                                               |
|--|--------|-----------------------------------------------------------------------------|---------|---------------------------------------------------------------------------------------------------------------|
|  | 440.31 | Atherosclerosis of autologous vein bypass graft of the extremities          | I70.444 | Atherosclerosis of autologous vein bypass graft(s) of the left leg with ulceration of heel and midfoot        |
|  | 440.31 | Atherosclerosis of autologous vein bypass graft of the extremities          | I70.445 | Atherosclerosis of autologous vein bypass graft(s) of the left leg with ulceration of other part of foot      |
|  | 440.31 | Atherosclerosis of autologous vein bypass graft of the extremities          | I70.448 | Atherosclerosis of autologous vein bypass graft(s) of the left leg with ulceration of other part of lower leg |
|  | 440.31 | Atherosclerosis of autologous vein bypass graft of the extremities          | I70.449 | Atherosclerosis of autologous vein bypass graft(s) of the left leg with ulceration of unspecified site        |
|  | 440.31 | Atherosclerosis of autologous vein bypass graft of the extremities          | I70.45  | Atherosclerosis of autologous vein bypass graft(s) of other extremity with ulceration                         |
|  | 440.31 | Atherosclerosis of autologous vein bypass graft of the extremities          | I70.461 | Atherosclerosis of autologous vein bypass graft(s) of the extremities with gangrene, right leg                |
|  | 440.31 | Atherosclerosis of autologous vein bypass graft of the extremities          | I70.462 | Atherosclerosis of autologous vein bypass graft(s) of the extremities with gangrene, left leg                 |
|  | 440.31 | Atherosclerosis of autologous vein bypass graft of the extremities          | I70.463 | Atherosclerosis of autologous vein bypass graft(s) of the extremities with gangrene, bilateral legs           |
|  | 440.31 | Atherosclerosis of autologous vein bypass graft of the extremities          | I70.468 | Atherosclerosis of autologous vein bypass graft(s) of the extremities with gangrene, other extremity          |
|  | 440.31 | Atherosclerosis of autologous vein bypass graft of the extremities          | I70.469 | Atherosclerosis of autologous vein bypass graft(s) of the extremities with gangrene, unspecified extremity    |
|  | 440.31 | Atherosclerosis of autologous vein bypass graft of the extremities          | I70.491 | Other atherosclerosis of autologous vein bypass graft(s) of the extremities, right leg                        |
|  | 440.31 | Atherosclerosis of autologous vein bypass graft of the extremities          | I70.492 | Other atherosclerosis of autologous vein bypass graft(s) of the extremities, left leg                         |
|  | 440.31 | Atherosclerosis of autologous vein bypass graft of the extremities          | I70.493 | Other atherosclerosis of autologous vein bypass graft(s) of the extremities, bilateral legs                   |
|  | 440.31 | Atherosclerosis of autologous vein bypass graft of the extremities          | I70.498 | Other atherosclerosis of autologous vein bypass graft(s) of the extremities, other extremity                  |
|  | 440.31 | Atherosclerosis of autologous vein bypass graft of the extremities          | I70.499 | Other atherosclerosis of autologous vein bypass graft(s) of the extremities, unspecified extremity            |
|  | 440.32 | Atherosclerosis of nonautologous biological bypass graft of the extremities | I70.501 | Unspecified atherosclerosis of nonautologous biological bypass graft(s) of the extremities, right leg         |
|  | 440.32 | Atherosclerosis of nonautologous biological bypass graft of the extremities | I70.502 | Unspecified atherosclerosis of nonautologous biological bypass graft(s) of the extremities, left leg          |
|  | 440.32 | Atherosclerosis of nonautologous biological bypass graft of the extremities | I70.503 | Unspecified atherosclerosis of nonautologous biological bypass graft(s) of the extremities, bilateral legs    |

|  |        |                                                                             |         |                                                                                                                                      |
|--|--------|-----------------------------------------------------------------------------|---------|--------------------------------------------------------------------------------------------------------------------------------------|
|  | 440.32 | Atherosclerosis of nonautologous biological bypass graft of the extremities | I70.508 | Unspecified atherosclerosis of nonautologous biological bypass graft(s) of the extremities, other extremity                          |
|  | 440.32 | Atherosclerosis of nonautologous biological bypass graft of the extremities | I70.509 | Unspecified atherosclerosis of nonautologous biological bypass graft(s) of the extremities, unspecified extremity                    |
|  | 440.32 | Atherosclerosis of nonautologous biological bypass graft of the extremities | I70.511 | Atherosclerosis of nonautologous biological bypass graft(s) of the extremities with intermittent claudication, right leg             |
|  | 440.32 | Atherosclerosis of nonautologous biological bypass graft of the extremities | I70.512 | Atherosclerosis of nonautologous biological bypass graft(s) of the extremities with intermittent claudication, left leg              |
|  | 440.32 | Atherosclerosis of nonautologous biological bypass graft of the extremities | I70.513 | Atherosclerosis of nonautologous biological bypass graft(s) of the extremities with intermittent claudication, bilateral legs        |
|  | 440.32 | Atherosclerosis of nonautologous biological bypass graft of the extremities | I70.518 | Atherosclerosis of nonautologous biological bypass graft(s) of the extremities with intermittent claudication, other extremity       |
|  | 440.32 | Atherosclerosis of nonautologous biological bypass graft of the extremities | I70.519 | Atherosclerosis of nonautologous biological bypass graft(s) of the extremities with intermittent claudication, unspecified extremity |
|  | 440.32 | Atherosclerosis of nonautologous biological bypass graft of the extremities | I70.521 | Atherosclerosis of nonautologous biological bypass graft(s) of the extremities with rest pain, right leg                             |
|  | 440.32 | Atherosclerosis of nonautologous biological bypass graft of the extremities | I70.522 | Atherosclerosis of nonautologous biological bypass graft(s) of the extremities with rest pain, left leg                              |
|  | 440.32 | Atherosclerosis of nonautologous biological bypass graft of the extremities | I70.523 | Atherosclerosis of nonautologous biological bypass graft(s) of the extremities with rest pain, bilateral legs                        |
|  | 440.32 | Atherosclerosis of nonautologous biological bypass graft of the extremities | I70.528 | Atherosclerosis of nonautologous biological bypass graft(s) of the extremities with rest pain, other extremity                       |
|  | 440.32 | Atherosclerosis of nonautologous biological bypass graft of the extremities | I70.529 | Atherosclerosis of nonautologous biological bypass graft(s) of the extremities with rest pain, unspecified extremity                 |
|  | 440.32 | Atherosclerosis of nonautologous biological bypass graft of the extremities | I70.531 | Atherosclerosis of nonautologous biological bypass graft(s) of the right leg with ulceration of thigh                                |
|  | 440.32 | Atherosclerosis of nonautologous biological bypass graft of the extremities | I70.532 | Atherosclerosis of nonautologous biological bypass graft(s) of the right leg with ulceration of calf                                 |

|  |        |                                                                             |         |                                                                                                                         |
|--|--------|-----------------------------------------------------------------------------|---------|-------------------------------------------------------------------------------------------------------------------------|
|  | 440.32 | Atherosclerosis of nonautologous biological bypass graft of the extremities | I70.533 | Atherosclerosis of nonautologous biological bypass graft(s) of the right leg with ulceration of ankle                   |
|  | 440.32 | Atherosclerosis of nonautologous biological bypass graft of the extremities | I70.534 | Atherosclerosis of nonautologous biological bypass graft(s) of the right leg with ulceration of heel and midfoot        |
|  | 440.32 | Atherosclerosis of nonautologous biological bypass graft of the extremities | I70.535 | Atherosclerosis of nonautologous biological bypass graft(s) of the right leg with ulceration of other part of foot      |
|  | 440.32 | Atherosclerosis of nonautologous biological bypass graft of the extremities | I70.538 | Atherosclerosis of nonautologous biological bypass graft(s) of the right leg with ulceration of other part of lower leg |
|  | 440.32 | Atherosclerosis of nonautologous biological bypass graft of the extremities | I70.539 | Atherosclerosis of nonautologous biological bypass graft(s) of the right leg with ulceration of unspecified site        |
|  | 440.32 | Atherosclerosis of nonautologous biological bypass graft of the extremities | I70.541 | Atherosclerosis of nonautologous biological bypass graft(s) of the left leg with ulceration of thigh                    |
|  | 440.32 | Atherosclerosis of nonautologous biological bypass graft of the extremities | I70.542 | Atherosclerosis of nonautologous biological bypass graft(s) of the left leg with ulceration of calf                     |
|  | 440.32 | Atherosclerosis of nonautologous biological bypass graft of the extremities | I70.543 | Atherosclerosis of nonautologous biological bypass graft(s) of the left leg with ulceration of ankle                    |
|  | 440.32 | Atherosclerosis of nonautologous biological bypass graft of the extremities | I70.544 | Atherosclerosis of nonautologous biological bypass graft(s) of the left leg with ulceration of heel and midfoot         |
|  | 440.32 | Atherosclerosis of nonautologous biological bypass graft of the extremities | I70.545 | Atherosclerosis of nonautologous biological bypass graft(s) of the left leg with ulceration of other part of foot       |
|  | 440.32 | Atherosclerosis of nonautologous biological bypass graft of the extremities | I70.548 | Atherosclerosis of nonautologous biological bypass graft(s) of the left leg with ulceration of other part of lower leg  |
|  | 440.32 | Atherosclerosis of nonautologous biological bypass graft of the extremities | I70.549 | Atherosclerosis of nonautologous biological bypass graft(s) of the left leg with ulceration of unspecified site         |
|  | 440.32 | Atherosclerosis of nonautologous biological bypass graft of the extremities | I70.55  | Atherosclerosis of nonautologous biological bypass graft(s) of other extremity with ulceration                          |
|  | 440.32 | Atherosclerosis of nonautologous biological bypass graft of the extremities | I70.561 | Atherosclerosis of nonautologous biological bypass graft(s) of the extremities with gangrene, right leg                 |

|                             |        |                                                                                   |         |                                                                                                                     |
|-----------------------------|--------|-----------------------------------------------------------------------------------|---------|---------------------------------------------------------------------------------------------------------------------|
|                             | 440.32 | Atherosclerosis of nonautologous biological bypass graft of the extremities       | I70.562 | Atherosclerosis of nonautologous biological bypass graft(s) of the extremities with gangrene, left leg              |
|                             | 440.32 | Atherosclerosis of nonautologous biological bypass graft of the extremities       | I70.563 | Atherosclerosis of nonautologous biological bypass graft(s) of the extremities with gangrene, bilateral legs        |
|                             | 440.32 | Atherosclerosis of nonautologous biological bypass graft of the extremities       | I70.568 | Atherosclerosis of nonautologous biological bypass graft(s) of the extremities with gangrene, other extremity       |
|                             | 440.32 | Atherosclerosis of nonautologous biological bypass graft of the extremities       | I70.569 | Atherosclerosis of nonautologous biological bypass graft(s) of the extremities with gangrene, unspecified extremity |
|                             | 440.32 | Atherosclerosis of nonautologous biological bypass graft of the extremities       | I70.591 | Other atherosclerosis of nonautologous biological bypass graft(s) of the extremities, right leg                     |
|                             | 440.32 | Atherosclerosis of nonautologous biological bypass graft of the extremities       | I70.592 | Other atherosclerosis of nonautologous biological bypass graft(s) of the extremities, left leg                      |
|                             | 440.32 | Atherosclerosis of nonautologous biological bypass graft of the extremities       | I70.593 | Other atherosclerosis of nonautologous biological bypass graft(s) of the extremities, bilateral legs                |
|                             | 440.32 | Atherosclerosis of nonautologous biological bypass graft of the extremities       | I70.598 | Other atherosclerosis of nonautologous biological bypass graft(s) of the extremities, other extremity               |
|                             | 440.32 | Atherosclerosis of nonautologous biological bypass graft of the extremities       | I70.599 | Other atherosclerosis of nonautologous biological bypass graft(s) of the extremities, unspecified extremity         |
| 7. Stroke / Ischemic stroke | ICD-9  | ICD-9-CM Diagnosis Labeling                                                       | ICD-10  | ICD-10-PCS Diagnosis Labeling                                                                                       |
|                             | 433.91 | Occlusion and stenosis of unspecified precerebral artery with cerebral infarction | I63.00  | Cerebral infarction due to thrombosis of unspecified precerebral artery                                             |
|                             | 433.21 | Occlusion and stenosis of carotid artery with cerebral infarction                 | I63.011 | Cerebral infarction due to thrombosis of right vertebral artery                                                     |
|                             | 433.21 | Occlusion and stenosis of carotid artery with cerebral infarction                 | I63.012 | Cerebral infarction due to thrombosis of left vertebral artery                                                      |
|                             | 433.21 | Occlusion and stenosis of carotid artery with cerebral infarction                 | I63.019 | Cerebral infarction due to thrombosis of unspecified vertebral artery                                               |
|                             | 433.01 | Occlusion and stenosis of basilar artery with cerebral infarction                 | I63.02  | Cerebral infarction due to thrombosis of basilar artery                                                             |
|                             | 433.11 | Occlusion and stenosis of carotid artery with cerebral infarction                 | I63.031 | Cerebral infarction due to thrombosis of right carotid artery                                                       |
|                             | 433.11 | Occlusion and stenosis of carotid artery with cerebral infarction                 | I63.032 | Cerebral infarction due to thrombosis of left carotid artery                                                        |
|                             | 433.11 | Occlusion and stenosis of carotid artery with cerebral infarction                 | I63.039 | Cerebral infarction due to thrombosis of unspecified carotid artery                                                 |

|  |        |                                                                                       |         |                                                                                                  |
|--|--------|---------------------------------------------------------------------------------------|---------|--------------------------------------------------------------------------------------------------|
|  | 433.81 | Occlusion and stenosis of other specified precerebral artery with cerebral infarction | I63.09  | Cerebral infarction due to thrombosis of other precerebral artery                                |
|  | 433.91 | Occlusion and stenosis of unspecified precerebral artery with cerebral infarction     | I63.10  | Cerebral infarction due to embolism of unspecified precerebral artery                            |
|  | 433.21 | Occlusion and stenosis of carotid artery with cerebral infarction                     | I63.111 | Cerebral infarction due to embolism of right vertebral artery                                    |
|  | 433.21 | Occlusion and stenosis of carotid artery with cerebral infarction                     | I63.112 | Cerebral infarction due to embolism of left vertebral artery                                     |
|  | 433.21 | Occlusion and stenosis of carotid artery with cerebral infarction                     | I63.119 | Cerebral infarction due to embolism of unspecified vertebral artery                              |
|  | 433.01 | Occlusion and stenosis of basilar artery with cerebral infarction                     | I63.12  | Cerebral infarction due to embolism of basilar artery                                            |
|  | 433.11 | Occlusion and stenosis of carotid artery with cerebral infarction                     | I63.131 | Cerebral infarction due to embolism of right carotid artery                                      |
|  | 433.11 | Occlusion and stenosis of carotid artery with cerebral infarction                     | I63.132 | Cerebral infarction due to embolism of left carotid artery                                       |
|  | 433.11 | Occlusion and stenosis of carotid artery with cerebral infarction                     | I63.139 | Cerebral infarction due to embolism of unspecified carotid artery                                |
|  | 433.81 | Occlusion and stenosis of other specified precerebral artery with cerebral infarction | I63.19  | Cerebral infarction due to embolism of other precerebral artery                                  |
|  | 433.91 | Occlusion and stenosis of unspecified precerebral artery with cerebral infarction     | I63.20  | Cerebral infarction due to unspecified occlusion or stenosis of unspecified precerebral arteries |
|  | 433.21 | Occlusion and stenosis of carotid artery with cerebral infarction                     | I63.211 | Cerebral infarction due to unspecified occlusion or stenosis of right vertebral arteries         |
|  | 433.21 | Occlusion and stenosis of carotid artery with cerebral infarction                     | I63.212 | Cerebral infarction due to unspecified occlusion or stenosis of left vertebral arteries          |
|  | 433.21 | Occlusion and stenosis of carotid artery with cerebral infarction                     | I63.219 | Cerebral infarction due to unspecified occlusion or stenosis of unspecified vertebral arteries   |
|  | 433.01 | Occlusion and stenosis of basilar artery with cerebral infarction                     | I63.22  | Cerebral infarction due to unspecified occlusion or stenosis of basilar arteries                 |
|  | 433.11 | Occlusion and stenosis of carotid artery with cerebral infarction                     | I63.231 | Cerebral infarction due to unspecified occlusion or stenosis of right carotid arteries           |
|  | 433.11 | Occlusion and stenosis of carotid artery with cerebral infarction                     | I63.232 | Cerebral infarction due to unspecified occlusion or stenosis of left carotid arteries            |
|  | 433.11 | Occlusion and stenosis of carotid artery with cerebral infarction                     | I63.239 | Cerebral infarction due to unspecified occlusion or stenosis of unspecified carotid arteries     |
|  | 433.91 | Occlusion and stenosis of unspecified precerebral artery with cerebral infarction     | I63.29  | Cerebral infarction due to unspecified occlusion or stenosis of other precerebral arteries       |
|  | 434.01 | Cerebral thrombosis with cerebral infarction                                          | I63.30  | Cerebral infarction due to thrombosis of unspecified cerebral artery                             |
|  | 434.01 | Cerebral thrombosis with cerebral infarction                                          | I63.311 | Cerebral infarction due to thrombosis of right middle cerebral artery                            |



|  |        |                                              |         |                                                                                |
|--|--------|----------------------------------------------|---------|--------------------------------------------------------------------------------|
|  | 434.01 | Cerebral thrombosis with cerebral infarction | I63.312 | Cerebral infarction due to thrombosis of left middle cerebral artery           |
|  | 434.01 | Cerebral thrombosis with cerebral infarction | I63.319 | Cerebral infarction due to thrombosis of unspecified middle cerebral artery    |
|  | 434.01 | Cerebral thrombosis with cerebral infarction | I63.321 | Cerebral infarction due to thrombosis of right anterior cerebral artery        |
|  | 434.01 | Cerebral thrombosis with cerebral infarction | I63.322 | Cerebral infarction due to thrombosis of left anterior cerebral artery         |
|  | 434.01 | Cerebral thrombosis with cerebral infarction | I63.329 | Cerebral infarction due to thrombosis of unspecified anterior cerebral artery  |
|  | 434.01 | Cerebral thrombosis with cerebral infarction | I63.331 | Cerebral infarction due to thrombosis of right posterior cerebral artery       |
|  | 434.01 | Cerebral thrombosis with cerebral infarction | I63.332 | Cerebral infarction due to thrombosis of left posterior cerebral artery        |
|  | 434.01 | Cerebral thrombosis with cerebral infarction | I63.339 | Cerebral infarction due to thrombosis of unspecified posterior cerebral artery |
|  | 434.01 | Cerebral thrombosis with cerebral infarction | I63.341 | Cerebral infarction due to thrombosis of right cerebellar artery               |
|  | 434.01 | Cerebral thrombosis with cerebral infarction | I63.342 | Cerebral infarction due to thrombosis of left cerebellar artery                |
|  | 434.01 | Cerebral thrombosis with cerebral infarction | I63.349 | Cerebral infarction due to thrombosis of unspecified cerebellar artery         |
|  | 434.01 | Cerebral thrombosis with cerebral infarction | I63.39  | Cerebral infarction due to thrombosis of other cerebral artery                 |
|  | 434.11 | Cerebral embolism with cerebral infarction   | I63.40  | Cerebral infarction due to embolism of unspecified cerebral artery             |
|  | 434.11 | Cerebral embolism with cerebral infarction   | I63.411 | Cerebral infarction due to embolism of right middle cerebral artery            |
|  | 434.11 | Cerebral embolism with cerebral infarction   | I63.412 | Cerebral infarction due to embolism of left middle cerebral artery             |
|  | 434.11 | Cerebral embolism with cerebral infarction   | I63.419 | Cerebral infarction due to embolism of unspecified middle cerebral artery      |
|  | 434.11 | Cerebral embolism with cerebral infarction   | I63.421 | Cerebral infarction due to embolism of right anterior cerebral artery          |
|  | 434.11 | Cerebral embolism with cerebral infarction   | I63.422 | Cerebral infarction due to embolism of left anterior cerebral artery           |
|  | 434.11 | Cerebral embolism with cerebral infarction   | I63.429 | Cerebral infarction due to embolism of unspecified anterior cerebral artery    |
|  | 434.11 | Cerebral embolism with cerebral infarction   | I63.431 | Cerebral infarction due to embolism of right posterior cerebral artery         |
|  | 434.11 | Cerebral embolism with cerebral infarction   | I63.432 | Cerebral infarction due to embolism of left posterior cerebral artery          |

|  |        |                                                                                                |         |                                                                                                       |
|--|--------|------------------------------------------------------------------------------------------------|---------|-------------------------------------------------------------------------------------------------------|
|  | 434.11 | Cerebral embolism with cerebral infarction                                                     | I63.439 | Cerebral infarction due to embolism of unspecified posterior cerebral artery                          |
|  | 434.11 | Cerebral embolism with cerebral infarction                                                     | I63.441 | Cerebral infarction due to embolism of right cerebellar artery                                        |
|  | 434.11 | Cerebral embolism with cerebral infarction                                                     | I63.442 | Cerebral infarction due to embolism of left cerebellar artery                                         |
|  | 434.11 | Cerebral embolism with cerebral infarction                                                     | I63.449 | Cerebral infarction due to embolism of unspecified cerebellar artery                                  |
|  | 434.11 | Cerebral embolism with cerebral infarction                                                     | I63.49  | Cerebral infarction due to embolism of other cerebral artery                                          |
|  | 434.91 | Unspecified cerebral artery occlusion with cerebral infarction                                 | I63.50  | Cerebral infarction due to unspecified occlusion or stenosis of unspecified cerebral artery           |
|  | 434.91 | Unspecified cerebral artery occlusion with cerebral infarction                                 | I63.511 | Cerebral infarction due to unspecified occlusion or stenosis of right middle cerebral artery          |
|  | 434.91 | Unspecified cerebral artery occlusion with cerebral infarction                                 | I63.512 | Cerebral infarction due to unspecified occlusion or stenosis of left middle cerebral artery           |
|  | 434.91 | Unspecified cerebral artery occlusion with cerebral infarction                                 | I63.519 | Cerebral infarction due to unspecified occlusion or stenosis of unspecified middle cerebral artery    |
|  | 434.91 | Unspecified cerebral artery occlusion with cerebral infarction                                 | I63.521 | Cerebral infarction due to unspecified occlusion or stenosis of right anterior cerebral artery        |
|  | 434.91 | Unspecified cerebral artery occlusion with cerebral infarction                                 | I63.522 | Cerebral infarction due to unspecified occlusion or stenosis of left anterior cerebral artery         |
|  | 434.91 | Unspecified cerebral artery occlusion with cerebral infarction                                 | I63.529 | Cerebral infarction due to unspecified occlusion or stenosis of unspecified anterior cerebral artery  |
|  | 434.91 | Unspecified cerebral artery occlusion with cerebral infarction                                 | I63.531 | Cerebral infarction due to unspecified occlusion or stenosis of right posterior cerebral artery       |
|  | 434.91 | Unspecified cerebral artery occlusion with cerebral infarction                                 | I63.532 | Cerebral infarction due to unspecified occlusion or stenosis of left posterior cerebral artery        |
|  | 434.91 | Unspecified cerebral artery occlusion with cerebral infarction                                 | I63.539 | Cerebral infarction due to unspecified occlusion or stenosis of unspecified posterior cerebral artery |
|  | 434.91 | Unspecified cerebral artery occlusion with cerebral infarction                                 | I63.541 | Cerebral infarction due to unspecified occlusion or stenosis of right cerebellar artery               |
|  | 434.91 | Unspecified cerebral artery occlusion with cerebral infarction                                 | I63.542 | Cerebral infarction due to unspecified occlusion or stenosis of left cerebellar artery                |
|  | 434.91 | Unspecified cerebral artery occlusion with cerebral infarction                                 | I63.549 | Cerebral infarction due to unspecified occlusion or stenosis of unspecified cerebellar artery         |
|  | 433.31 | Occlusion and stenosis of multiple and bilateral precerebral arteries with cerebral infarction | I63.59  | Cerebral infarction due to unspecified occlusion or stenosis of other cerebral artery                 |
|  | 433.81 | Occlusion and stenosis of other specified precerebral artery with cerebral infarction          | I63.59  | Cerebral infarction due to unspecified occlusion or stenosis of other cerebral artery                 |
|  | 434.91 | Unspecified cerebral artery occlusion with cerebral infarction                                 | I63.59  | Cerebral infarction due to unspecified occlusion or stenosis of other cerebral artery                 |

|  |        |                                                                                           |         |                                                                                      |
|--|--------|-------------------------------------------------------------------------------------------|---------|--------------------------------------------------------------------------------------|
|  | 434.01 | Cerebral thrombosis with cerebral infarction                                              | I63.6   | Cerebral infarction due to cerebral venous thrombosis, nonpyogenic                   |
|  | 434.91 | Unspecified cerebral artery occlusion with cerebral infarction                            | I63.8   | Other cerebral infarction                                                            |
|  | 434.91 | Unspecified cerebral artery occlusion with cerebral infarction                            | I63.9   | Cerebral infarction, unspecified                                                     |
|  | 437.3  | Cerebral aneurysm, nonruptured                                                            | I67.0   | Dissection of cerebral arteries, nonruptured                                         |
|  | 437.3  | Cerebral aneurysm, nonruptured                                                            | I67.1   | Cerebral aneurysm, nonruptured                                                       |
|  | 437.0  | Cerebral atherosclerosis                                                                  | I67.2   | Cerebral atherosclerosis                                                             |
|  | 046.3  | Progressive multifocal leukoencephalopathy                                                | I67.3   | Progressive vascular leukoencephalopathy                                             |
|  | 437.2  | Hypertensive encephalopathy                                                               | I67.4   | Hypertensive encephalopathy                                                          |
|  | 437.5  | Moyamoya disease                                                                          | I67.5   | Moyamoya disease                                                                     |
|  | 437.1  | Other generalized ischemic cerebrovascular disease                                        | I67.81  | Acute cerebrovascular insufficiency                                                  |
|  | 437.1  | Other generalized ischemic cerebrovascular disease                                        | I67.82  | Cerebral ischemia                                                                    |
|  | 348.3  | Encephalopathy, unspecified                                                               | I67.83  | Posterior reversible encephalopathy syndrome                                         |
|  | 435.9  | Unspecified transient cerebral ischemia                                                   | I67.841 | Reversible cerebrovascular vasoconstriction syndrome                                 |
|  | 435.9  | Unspecified transient cerebral ischemia                                                   | I67.848 | Other cerebrovascular vasospasm and vasoconstriction                                 |
|  | 436    | Acute, but ill-defined, cerebrovascular disease                                           | I67.89  | Other cerebrovascular disease                                                        |
|  | 437.1  | Other generalized ischemic cerebrovascular disease                                        | I67.89  | Other cerebrovascular disease                                                        |
|  | 437.8  | Other and ill-defined cerebrovascular disease                                             | I67.89  | Other cerebrovascular disease                                                        |
|  | 437.9  | Ill-defined cerebrovascular disease, unspecified                                          | I67.9   | Cerebrovascular disease, unspecified                                                 |
|  | 438.9  | Unspecified late effects of cerebrovascular disease                                       | I69.30  | Unspecified sequelae of cerebral infarction                                          |
|  | 438.0  | Cognitive deficits, late effects of cerebrovascular disease                               | I69.31  | Cognitive deficits following cerebral infarction                                     |
|  | 438.9  | Unspecified late effects of cerebrovascular disease                                       | I69.31  | Cognitive deficits following cerebral infarction                                     |
|  | 438.11 | Aphasia, late effects of cerebrovascular disease                                          | I69.320 | Aphasia following cerebral infarction                                                |
|  | 438.9  | Unspecified late effects of cerebrovascular disease                                       | I69.320 | Aphasia following cerebral infarction                                                |
|  | 438.12 | Dysphasia, late effects of cerebrovascular disease                                        | I69.321 | Dysphasia following cerebral infarction                                              |
|  | 438.9  | Unspecified late effects of cerebrovascular disease                                       | I69.321 | Dysphasia following cerebral infarction                                              |
|  | 438.19 | Other Speech and language deficits, late effects of cerebrovascular disease               | I69.322 | Dysarthria following cerebral infarction                                             |
|  | 438.19 | Other Speech and language deficits, late effects of cerebrovascular disease               | I69.323 | Fluency disorder following cerebral infarction                                       |
|  | 438.19 | Other Speech and language deficits, late effects of cerebrovascular disease               | I69.328 | Other speech and language deficits following cerebral infarction                     |
|  | 438.9  | Unspecified late effects of cerebrovascular disease                                       | I69.328 | Other speech and language deficits following cerebral infarction                     |
|  | 438.31 | Monoplegia of upper limb affecting dominant side, late effects of cerebrovascular disease | I69.331 | Monoplegia of upper limb following cerebral infarction affecting right dominant side |

|  |        |                                                                                              |         |                                                                                            |
|--|--------|----------------------------------------------------------------------------------------------|---------|--------------------------------------------------------------------------------------------|
|  | 438.31 | Monoplegia of upper limb affecting dominant side, late effects of cerebrovascular disease    | I69.332 | Monoplegia of upper limb following cerebral infarction affecting left dominant side        |
|  | 438.32 | Monoplegia of upper limb affecting nondominant side, late effects of cerebrovascular disease | I69.333 | Monoplegia of upper limb following cerebral infarction affecting right non-dominant side   |
|  | 438.32 | Monoplegia of upper limb affecting nondominant side, late effects of cerebrovascular disease | I69.334 | Monoplegia of upper limb following cerebral infarction affecting left non-dominant side    |
|  | 438.30 | Monoplegia of upper limb affecting unspecified side, late effects of cerebrovascular disease | I69.339 | Monoplegia of upper limb following cerebral infarction affecting unspecified side          |
|  | 438.41 | Monoplegia of lower limb affecting dominant side, late effects of cerebrovascular disease    | I69.341 | Monoplegia of lower limb following cerebral infarction affecting right dominant side       |
|  | 438.41 | Monoplegia of lower limb affecting dominant side, late effects of cerebrovascular disease    | I69.342 | Monoplegia of lower limb following cerebral infarction affecting left dominant side        |
|  | 438.42 | Monoplegia of lower limb affecting nondominant side, late effects of cerebrovascular disease | I69.343 | Monoplegia of lower limb following cerebral infarction affecting right non-dominant side   |
|  | 438.42 | Monoplegia of lower limb affecting nondominant side, late effects of cerebrovascular disease | I69.344 | Monoplegia of lower limb following cerebral infarction affecting left non-dominant side    |
|  | 438.40 | Monoplegia of lower limb affecting unspecified side, late effects of cerebrovascular disease | I69.349 | Monoplegia of lower limb following cerebral infarction affecting unspecified side          |
|  | 438.9  | Unspecified late effects of cerebrovascular disease                                          | I69.349 | Monoplegia of lower limb following cerebral infarction affecting unspecified side          |
|  | 438.21 | Hemiplegia affecting dominant side, late effects of cerebrovascular disease                  | I69.351 | Hemiplegia and hemiparesis following cerebral infarction affecting right dominant side     |
|  | 438.21 | Hemiplegia affecting dominant side, late effects of cerebrovascular disease                  | I69.352 | Hemiplegia and hemiparesis following cerebral infarction affecting left dominant side      |
|  | 438.22 | Hemiplegia affecting nondominant side, late effects of cerebrovascular disease               | I69.353 | Hemiplegia and hemiparesis following cerebral infarction affecting right non-dominant side |
|  | 438.22 | Hemiplegia affecting nondominant side, late effects of cerebrovascular disease               | I69.354 | Hemiplegia and hemiparesis following cerebral infarction affecting left non-dominant side  |
|  | 438.20 | Hemiplegia affecting unspecified side, late effects of cerebrovascular disease               | I69.359 | Hemiplegia and hemiparesis following cerebral infarction affecting unspecified side        |
|  | 438.51 | Other paralytic syndrome affecting dominant side, late effects of cerebrovascular disease    | I69.361 | Other paralytic syndrome following cerebral infarction affecting right dominant side       |
|  | 438.9  | Unspecified late effects of cerebrovascular disease                                          | I69.361 | Other paralytic syndrome following cerebral infarction affecting right dominant side       |
|  | 438.51 | Other paralytic syndrome affecting dominant side, late effects of cerebrovascular disease    | I69.362 | Other paralytic syndrome following cerebral infarction affecting left dominant side        |
|  | 438.9  | Unspecified late effects of cerebrovascular disease                                          | I69.362 | Other paralytic syndrome following cerebral infarction affecting left dominant side        |
|  | 438.52 | Other paralytic syndrome affecting nondominant side, late effects of cerebrovascular disease | I69.363 | Other paralytic syndrome following cerebral infarction affecting right non-dominant side   |
|  | 438.9  | Unspecified late effects of cerebrovascular disease                                          | I69.363 | Other paralytic syndrome following cerebral infarction affecting right non-dominant side   |

|  |        |                                                                                              |         |                                                                                         |
|--|--------|----------------------------------------------------------------------------------------------|---------|-----------------------------------------------------------------------------------------|
|  | 438.52 | Other paralytic syndrome affecting nondominant side, late effects of cerebrovascular disease | I69.364 | Other paralytic syndrome following cerebral infarction affecting left non-dominant side |
|  | 438.9  | Unspecified late effects of cerebrovascular disease                                          | I69.364 | Other paralytic syndrome following cerebral infarction affecting left non-dominant side |
|  | 438.53 | Other paralytic syndrome, bilateral, late effects of cerebrovascular disease                 | I69.365 | Other paralytic syndrome following cerebral infarction, bilateral                       |
|  | 438.9  | Unspecified late effects of cerebrovascular disease                                          | I69.365 | Other paralytic syndrome following cerebral infarction, bilateral                       |
|  | 438.50 | Other paralytic syndrome affecting unspecified side, late effects of cerebrovascular disease | I69.369 | Other paralytic syndrome following cerebral infarction affecting unspecified side       |
|  | 438.9  | Unspecified late effects of cerebrovascular disease                                          | I69.369 | Other paralytic syndrome following cerebral infarction affecting unspecified side       |
|  | 438.81 | Apraxia, late effects of cerebrovascular disease                                             | I69.390 | Apraxia following cerebral infarction                                                   |
|  | 438.9  | Unspecified late effects of cerebrovascular disease                                          | I69.390 | Apraxia following cerebral infarction                                                   |
|  | 438.82 | Dysphagia, late effects of cerebrovascular disease                                           | I69.391 | Dysphagia following cerebral infarction                                                 |
|  | 438.9  | Unspecified late effects of cerebrovascular disease                                          | I69.391 | Dysphagia following cerebral infarction                                                 |
|  | 438.89 | Other late effects of cerebrovascular disease                                                | I69.392 | Facial weakness following cerebral infarction                                           |
|  | 438.9  | Unspecified late effects of cerebrovascular disease                                          | I69.392 | Facial weakness following cerebral infarction                                           |
|  | 438.89 | Other late effects of cerebrovascular disease                                                | I69.393 | Ataxia following cerebral infarction                                                    |
|  | 438.9  | Unspecified late effects of cerebrovascular disease                                          | I69.393 | Ataxia following cerebral infarction                                                    |
|  | 438.89 | Other late effects of cerebrovascular disease                                                | I69.398 | Other sequelae of cerebral infarction                                                   |
|  | 438.9  | Unspecified late effects of cerebrovascular disease                                          | I69.398 | Other sequelae of cerebral infarction                                                   |
|  | 438.9  | Unspecified late effects of cerebrovascular disease                                          | I69.80  | Unspecified sequelae of other cerebrovascular disease                                   |
|  | 438.0  | Cognitive deficits, late effects of cerebrovascular disease                                  | I69.81  | Cognitive deficits following other cerebrovascular disease                              |
|  | 438.9  | Unspecified late effects of cerebrovascular disease                                          | I69.81  | Cognitive deficits following other cerebrovascular disease                              |
|  | 438.11 | Aphasia, late effects of cerebrovascular disease                                             | I69.820 | Aphasia following other cerebrovascular disease                                         |
|  | 438.9  | Unspecified late effects of cerebrovascular disease                                          | I69.820 | Aphasia following other cerebrovascular disease                                         |
|  | 438.12 | Dysphasia, late effects of cerebrovascular disease                                           | I69.821 | Dysphasia following other cerebrovascular disease                                       |
|  | 438.9  | Unspecified late effects of cerebrovascular disease                                          | I69.821 | Dysphasia following other cerebrovascular disease                                       |
|  | 438.19 | Other Speech and language deficits, late effects of cerebrovascular disease                  | I69.822 | Dysarthria following other cerebrovascular disease                                      |
|  | 438.19 | Other Speech and language deficits, late effects of cerebrovascular disease                  | I69.823 | Fluency disorder following other cerebrovascular disease                                |
|  | 438.19 | Other Speech and language deficits, late effects of cerebrovascular disease                  | I69.828 | Other speech and language deficits following other cerebrovascular disease              |
|  | 438.9  | Unspecified late effects of cerebrovascular disease                                          | I69.828 | Other speech and language deficits following other cerebrovascular disease              |

|  |        |                                                                                              |         |                                                                                                      |
|--|--------|----------------------------------------------------------------------------------------------|---------|------------------------------------------------------------------------------------------------------|
|  | 438.31 | Monoplegia of upper limb affecting dominant side, late effects of cerebrovascular disease    | 169.831 | Monoplegia of upper limb following other cerebrovascular disease affecting right dominant side       |
|  | 438.31 | Monoplegia of upper limb affecting dominant side, late effects of cerebrovascular disease    | 169.832 | Monoplegia of upper limb following other cerebrovascular disease affecting left dominant side        |
|  | 438.32 | Monoplegia of upper limb affecting nondominant side, late effects of cerebrovascular disease | 169.833 | Monoplegia of upper limb following other cerebrovascular disease affecting right non-dominant side   |
|  | 438.32 | Monoplegia of upper limb affecting nondominant side, late effects of cerebrovascular disease | 169.834 | Monoplegia of upper limb following other cerebrovascular disease affecting left non-dominant side    |
|  | 438.30 | Monoplegia of upper limb affecting unspecified side, late effects of cerebrovascular disease | 169.839 | Monoplegia of upper limb following other cerebrovascular disease affecting unspecified side          |
|  | 438.41 | Monoplegia of lower limb affecting dominant side, late effects of cerebrovascular disease    | 169.841 | Monoplegia of lower limb following other cerebrovascular disease affecting right dominant side       |
|  | 438.41 | Monoplegia of lower limb affecting dominant side, late effects of cerebrovascular disease    | 169.842 | Monoplegia of lower limb following other cerebrovascular disease affecting left dominant side        |
|  | 438.42 | Monoplegia of lower limb affecting nondominant side, late effects of cerebrovascular disease | 169.843 | Monoplegia of lower limb following other cerebrovascular disease affecting right non-dominant side   |
|  | 438.42 | Monoplegia of lower limb affecting nondominant side, late effects of cerebrovascular disease | 169.844 | Monoplegia of lower limb following other cerebrovascular disease affecting left non-dominant side    |
|  | 438.40 | Monoplegia of lower limb affecting unspecified side, late effects of cerebrovascular disease | 169.849 | Monoplegia of lower limb following other cerebrovascular disease affecting unspecified side          |
|  | 438.9  | Unspecified late effects of cerebrovascular disease                                          | 169.849 | Monoplegia of lower limb following other cerebrovascular disease affecting unspecified side          |
|  | 438.21 | Hemiplegia affecting dominant side, late effects of cerebrovascular disease                  | 169.851 | Hemiplegia and hemiparesis following other cerebrovascular disease affecting right dominant side     |
|  | 438.21 | Hemiplegia affecting dominant side, late effects of cerebrovascular disease                  | 169.852 | Hemiplegia and hemiparesis following other cerebrovascular disease affecting left dominant side      |
|  | 438.22 | Hemiplegia affecting nondominant side, late effects of cerebrovascular disease               | 169.853 | Hemiplegia and hemiparesis following other cerebrovascular disease affecting right non-dominant side |
|  | 438.22 | Hemiplegia affecting nondominant side, late effects of cerebrovascular disease               | 169.854 | Hemiplegia and hemiparesis following other cerebrovascular disease affecting left non-dominant side  |

|  |        |                                                                                              |         |                                                                                                    |
|--|--------|----------------------------------------------------------------------------------------------|---------|----------------------------------------------------------------------------------------------------|
|  | 438.20 | Hemiplegia affecting unspecified side, late effects of cerebrovascular disease               | 169.859 | Hemiplegia and hemiparesis following other cerebrovascular disease affecting unspecified side      |
|  | 438.51 | Other paralytic syndrome affecting dominant side, late effects of cerebrovascular disease    | 169.861 | Other paralytic syndrome following other cerebrovascular disease affecting right dominant side     |
|  | 438.9  | Unspecified late effects of cerebrovascular disease                                          | 169.861 | Other paralytic syndrome following other cerebrovascular disease affecting right dominant side     |
|  | 438.51 | Other paralytic syndrome affecting dominant side, late effects of cerebrovascular disease    | 169.862 | Other paralytic syndrome following other cerebrovascular disease affecting left dominant side      |
|  | 438.9  | Unspecified late effects of cerebrovascular disease                                          | 169.862 | Other paralytic syndrome following other cerebrovascular disease affecting left dominant side      |
|  | 438.52 | Other paralytic syndrome affecting nondominant side, late effects of cerebrovascular disease | 169.863 | Other paralytic syndrome following other cerebrovascular disease affecting right non-dominant side |
|  | 438.9  | Unspecified late effects of cerebrovascular disease                                          | 169.863 | Other paralytic syndrome following other cerebrovascular disease affecting right non-dominant side |
|  | 438.52 | Other paralytic syndrome affecting nondominant side, late effects of cerebrovascular disease | 169.864 | Other paralytic syndrome following other cerebrovascular disease affecting left non-dominant side  |
|  | 438.9  | Unspecified late effects of cerebrovascular disease                                          | 169.864 | Other paralytic syndrome following other cerebrovascular disease affecting left non-dominant side  |
|  | 438.53 | Other paralytic syndrome, bilateral, late effects of cerebrovascular disease                 | 169.865 | Other paralytic syndrome following other cerebrovascular disease, bilateral                        |
|  | 438.9  | Unspecified late effects of cerebrovascular disease                                          | 169.865 | Other paralytic syndrome following other cerebrovascular disease, bilateral                        |
|  | 438.50 | Other paralytic syndrome affecting unspecified side, late effects of cerebrovascular disease | 169.869 | Other paralytic syndrome following other cerebrovascular disease affecting unspecified side        |
|  | 438.9  | Unspecified late effects of cerebrovascular disease                                          | 169.869 | Other paralytic syndrome following other cerebrovascular disease affecting unspecified side        |
|  | 438.81 | Apraxia, late effects of cerebrovascular disease                                             | 169.890 | Apraxia following other cerebrovascular disease                                                    |
|  | 438.9  | Unspecified late effects of cerebrovascular disease                                          | 169.890 | Apraxia following other cerebrovascular disease                                                    |
|  | 438.82 | Dysphagia, late effects of cerebrovascular disease                                           | 169.891 | Dysphagia following other cerebrovascular disease                                                  |
|  | 438.9  | Unspecified late effects of cerebrovascular disease                                          | 169.891 | Dysphagia following other cerebrovascular disease                                                  |
|  | 438.89 | Other late effects of cerebrovascular disease                                                | 169.892 | Facial weakness following other cerebrovascular disease                                            |
|  | 438.9  | Unspecified late effects of cerebrovascular disease                                          | 169.892 | Facial weakness following other cerebrovascular disease                                            |

|  |        |                                                                                              |         |                                                                                                          |
|--|--------|----------------------------------------------------------------------------------------------|---------|----------------------------------------------------------------------------------------------------------|
|  | 438.89 | Other late effects of cerebrovascular disease                                                | 169.893 | Ataxia following other cerebrovascular disease                                                           |
|  | 438.9  | Unspecified late effects of cerebrovascular disease                                          | 169.893 | Ataxia following other cerebrovascular disease                                                           |
|  | 438.89 | Other late effects of cerebrovascular disease                                                | 169.898 | Other sequelae of other cerebrovascular disease                                                          |
|  | 438.9  | Unspecified late effects of cerebrovascular disease                                          | 169.90  | Unspecified sequelae of unspecified cerebrovascular disease                                              |
|  | 438.0  | Cognitive deficits, late effects of cerebrovascular disease                                  | 169.91  | Cognitive deficits following unspecified cerebrovascular disease                                         |
|  | 438.11 | Aphasia, late effects of cerebrovascular disease                                             | 169.920 | Aphasia following unspecified cerebrovascular disease                                                    |
|  | 438.12 | Dysphasia, late effects of cerebrovascular disease                                           | 169.921 | Dysphasia following unspecified cerebrovascular disease                                                  |
|  | 438.19 | Other Speech and language deficits, late effects of cerebrovascular disease                  | 169.922 | Dysarthria following unspecified cerebrovascular disease                                                 |
|  | 438.19 | Other Speech and language deficits, late effects of cerebrovascular disease                  | 169.923 | Fluency disorder following unspecified cerebrovascular disease                                           |
|  | 438.10 | Speech and language deficit, unspecified, late effects of cerebrovascular disease            | 169.928 | Other speech and language deficits following unspecified cerebrovascular disease                         |
|  | 438.19 | Other Speech and language deficits, late effects of cerebrovascular disease                  | 169.928 | Other speech and language deficits following unspecified cerebrovascular disease                         |
|  | 438.31 | Monoplegia of upper limb affecting dominant side, late effects of cerebrovascular disease    | 169.931 | Monoplegia of upper limb following unspecified cerebrovascular disease affecting right dominant side     |
|  | 438.31 | Monoplegia of upper limb affecting dominant side, late effects of cerebrovascular disease    | 169.932 | Monoplegia of upper limb following unspecified cerebrovascular disease affecting left dominant side      |
|  | 438.32 | Monoplegia of upper limb affecting nondominant side, late effects of cerebrovascular disease | 169.933 | Monoplegia of upper limb following unspecified cerebrovascular disease affecting right non-dominant side |
|  | 438.32 | Monoplegia of upper limb affecting nondominant side, late effects of cerebrovascular disease | 169.934 | Monoplegia of upper limb following unspecified cerebrovascular disease affecting left non-dominant side  |
|  | 438.30 | Monoplegia of upper limb affecting unspecified side, late effects of cerebrovascular disease | 169.939 | Monoplegia of upper limb following unspecified cerebrovascular disease affecting unspecified side        |
|  | 438.41 | Monoplegia of lower limb affecting dominant side, late effects of cerebrovascular disease    | 169.941 | Monoplegia of lower limb following unspecified cerebrovascular disease affecting right dominant side     |
|  | 438.41 | Monoplegia of lower limb affecting dominant side, late effects of cerebrovascular disease    | 169.942 | Monoplegia of lower limb following unspecified cerebrovascular disease affecting left dominant side      |
|  | 438.42 | Monoplegia of lower limb affecting nondominant side, late effects of cerebrovascular disease | 169.943 | Monoplegia of lower limb following unspecified cerebrovascular disease affecting right non-dominant side |



|  |        |                                                                                              |         |                                                                                                            |
|--|--------|----------------------------------------------------------------------------------------------|---------|------------------------------------------------------------------------------------------------------------|
|  | 438.42 | Monoplegia of lower limb affecting nondominant side, late effects of cerebrovascular disease | 169.944 | Monoplegia of lower limb following unspecified cerebrovascular disease affecting left non-dominant side    |
|  | 438.40 | Monoplegia of lower limb affecting unspecified side, late effects of cerebrovascular disease | 169.949 | Monoplegia of lower limb following unspecified cerebrovascular disease affecting unspecified side          |
|  | 438.21 | Hemiplegia affecting dominant side, late effects of cerebrovascular disease                  | 169.951 | Hemiplegia and hemiparesis following unspecified cerebrovascular disease affecting right dominant side     |
|  | 438.21 | Hemiplegia affecting dominant side, late effects of cerebrovascular disease                  | 169.952 | Hemiplegia and hemiparesis following unspecified cerebrovascular disease affecting left dominant side      |
|  | 438.22 | Hemiplegia affecting nondominant side, late effects of cerebrovascular disease               | 169.953 | Hemiplegia and hemiparesis following unspecified cerebrovascular disease affecting right non-dominant side |
|  | 438.22 | Hemiplegia affecting nondominant side, late effects of cerebrovascular disease               | 169.954 | Hemiplegia and hemiparesis following unspecified cerebrovascular disease affecting left non-dominant side  |
|  | 438.20 | Hemiplegia affecting unspecified side, late effects of cerebrovascular disease               | 169.959 | Hemiplegia and hemiparesis following unspecified cerebrovascular disease affecting unspecified side        |
|  | 438.51 | Other paralytic syndrome affecting dominant side, late effects of cerebrovascular disease    | 169.961 | Other paralytic syndrome following unspecified cerebrovascular disease affecting right dominant side       |
|  | 438.51 | Other paralytic syndrome affecting dominant side, late effects of cerebrovascular disease    | 169.962 | Other paralytic syndrome following unspecified cerebrovascular disease affecting left dominant side        |
|  | 438.52 | Other paralytic syndrome affecting nondominant side, late effects of cerebrovascular disease | 169.963 | Other paralytic syndrome following unspecified cerebrovascular disease affecting right non-dominant side   |
|  | 438.52 | Other paralytic syndrome affecting nondominant side, late effects of cerebrovascular disease | 169.964 | Other paralytic syndrome following unspecified cerebrovascular disease affecting left non-dominant side    |
|  | 438.53 | Other paralytic syndrome, bilateral, late effects of cerebrovascular disease                 | 169.965 | Other paralytic syndrome following unspecified cerebrovascular disease, bilateral                          |
|  | 438.50 | Other paralytic syndrome affecting unspecified side, late effects of cerebrovascular disease | 169.969 | Other paralytic syndrome following unspecified cerebrovascular disease affecting unspecified side          |
|  | 438.81 | Apraxia, late effects of cerebrovascular disease                                             | 169.990 | Apraxia following unspecified cerebrovascular disease                                                      |
|  | 438.82 | Dysphagia, late effects of cerebrovascular disease                                           | 169.991 | Dysphagia following unspecified cerebrovascular disease                                                    |
|  | 438.89 | Other late effects of cerebrovascular disease                                                | 169.992 | Facial weakness following unspecified cerebrovascular disease                                              |

|                        |        |                                               |         |                                                              |
|------------------------|--------|-----------------------------------------------|---------|--------------------------------------------------------------|
|                        | 438.89 | Other late effects of cerebrovascular disease | I69.993 | Ataxia following unspecified cerebrovascular disease         |
|                        | 438.89 | Other late effects of cerebrovascular disease | I69.998 | Other sequelae following unspecified cerebrovascular disease |
| 8. Atrial fibrillation | ICD-9  | ICD-9-CM Diagnosis Labeling                   | ICD-10  | ICD-10-PCS Diagnosis Labeling                                |
|                        | 427.31 | Atrial fibrillation                           | I48.0   | Paroxysmal atrial fibrillation                               |
|                        | 427.32 | Atrial flutter                                | I48.1   | Persistent atrial fibrillation                               |
|                        | 427.31 | Atrial fibrillation                           | I48.2   | Chronic atrial fibrillation                                  |
|                        | 427.31 | Atrial fibrillation                           | I48.91  | Unspecified atrial fibrillation                              |
